# Supplementary material for: Strong interactions between carbones and halogen atomic centers
Source: Royal Society of Chemistry journal article supplement (doi:10.1039/d6sc02210c), 2026-06-19
Supplement: d6sc02210c1.pdf [file d6sc02210c1.pdf]

## Supporting Information

### Strong Interactions between Carbones and Halogen Atomic Centers

Shunhua Li,<sup>a</sup> Hangyu Zhou,<sup>a</sup> Qingzhong Li,<sup>a,\*</sup> Steve Scheiner<sup>\*,b</sup>

<sup>a</sup> The Laboratory of Theoretical and Computational Chemistry, School of Chemistry and Chemical Engineering, Yantai University, Yantai 264005, P. R. China.

<sup>b</sup> Department of Chemistry and Biochemistry, Utah State University, Logan, UT 84322-0300, USA

Corresponding authors: Qingzhong Li and Steve Scheiner  
E-mails: [lqz@ytu.edu.cn](mailto:lqz@ytu.edu.cn); [steve.scheiner@usu.edu](mailto:steve.scheiner@usu.edu)

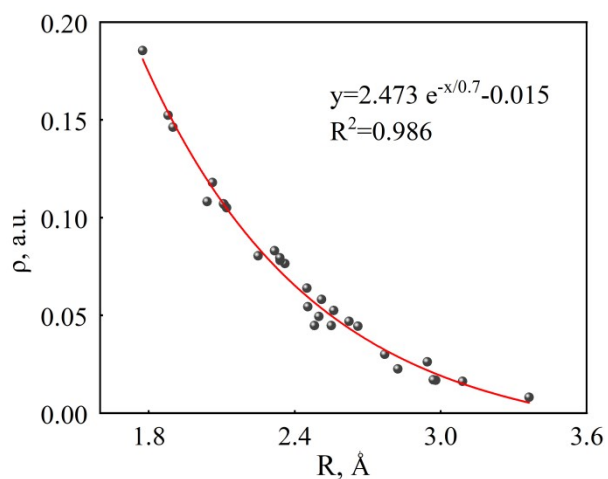

**Fig. S1.** Relationship between the C...X distance ( $R$ ) and the electron density ( $\rho$ ) at the C...X bond critical point.

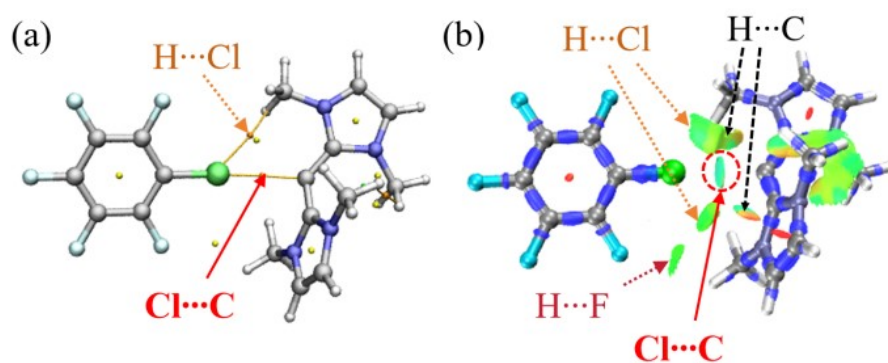

**Fig. S2.** (a) AIM plot and (b) NCI plot for the CLB...ClC<sub>6</sub>F<sub>5</sub> complex. In the NCI plot, blue, green, and red regions correspond to strong attractive, weak attractive, and strong repulsive interactions, respectively.

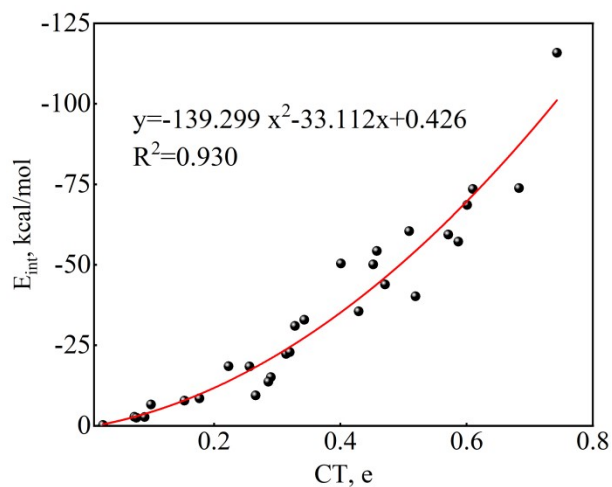

**Fig. S3.** Correlation between charge transfer (CT) and interaction energies ( $E_{\text{int}}$ ).

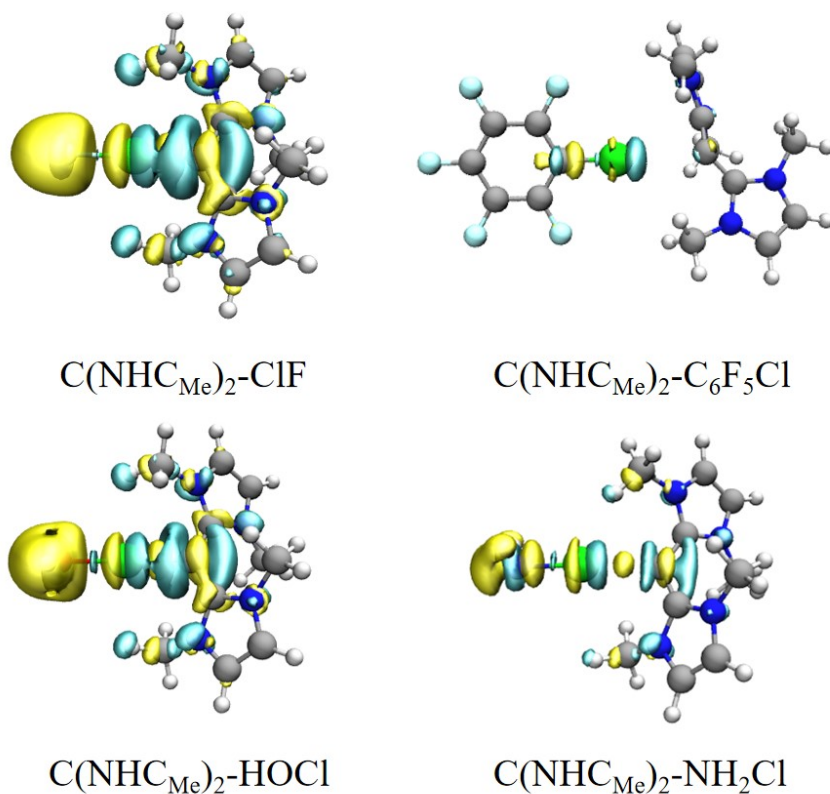

**Fig. S4.** Electron density changes upon complex formation. The isosurface level is set at  $\pm 0.002$  a.u. Yellow regions ( $+0.002$  a.u.) indicate an increase in electron density, whereas blue regions ( $-0.002$  a.u.) indicate a decrease in electron density.

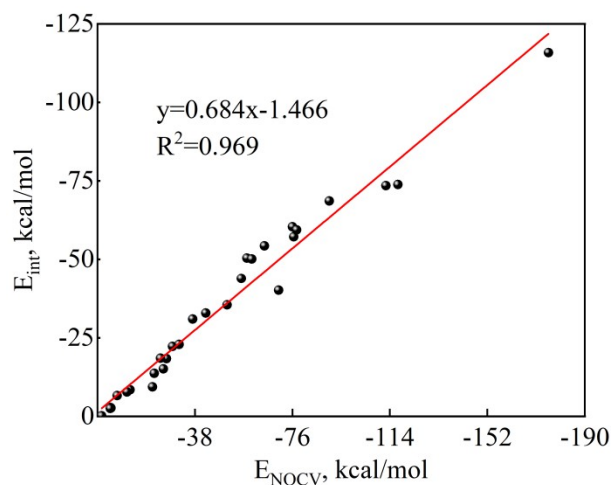

**Fig. S5.** Correlation between NOCV orbital energies ( $E_{\text{NOCV}}$ ) and interaction energies ( $E_{\text{int}}$ ).

**Table S1** Charge transfer from CLB to XY (CT, e) and the major NOCV orbital energies ( $E_{\text{nocv}}$ , kcal/mol) from  $\pi_{\text{C-C}}$  into  $\sigma^*_{\text{X-Y}}$ .

|                 | CT    | $E_{\text{nocv}}$ |                                   | CT    | $E_{\text{nocv}}$ |
|-----------------|-------|-------------------|-----------------------------------|-------|-------------------|
| Cl <sub>2</sub> | 0.683 | -117.08           | ClCN                              | 0.100 | -7.69             |
| Br <sub>2</sub> | 0.587 | -76.55            | BrCN                              | 0.314 | -29.25            |
| I <sub>2</sub>  | 0.471 | -56.07            | ICN                               | 0.328 | -37.09            |
| ClF             | 0.610 | -112.44           | ClNH <sub>2</sub>                 | 0.266 | -21.49            |
| BrF             | 0.509 | -76.02            | BrNH <sub>2</sub>                 | 0.290 | -25.69            |
| IF              | 0.401 | -58.26            | INH <sub>2</sub>                  | 0.256 | -26.94            |
| BrCl            | 0.571 | -77.60            | ClCF <sub>3</sub>                 | 0.074 | -5.11             |
| ICl             | 0.452 | -60.13            | BrCF <sub>3</sub>                 | 0.177 | -12.71            |
| CINC            | 0.743 | -175.82           | ICF <sub>3</sub>                  | 0.223 | -24.57            |
| BrNC            | 0.601 | -90.33            | ClC <sub>6</sub> F <sub>5</sub>   | 0.090 | -5.30             |
| INC             | 0.458 | -65.11            | BrC <sub>6</sub> F <sub>5</sub>   | 0.286 | -22.13            |
| ClOH            | 0.519 | -70.61            | IC <sub>6</sub> F <sub>5</sub>    | 0.320 | -31.83            |
| BrOH            | 0.429 | -50.50            | ClC <sub>5</sub> H <sub>4</sub> N | 0.024 | -1.63             |
| IOH             | 0.343 | -42.21            | BrC <sub>5</sub> H <sub>4</sub> N | 0.077 | -4.96             |
|                 |       |                   | IC <sub>5</sub> H <sub>4</sub> N  | 0.153 | -11.50            |

**Table S2** ETS-NOCV interaction energy components, all in kcal/mol.

|                                   | $\Delta E_{\text{Pauli}}$ | $\Delta E_{\text{elstat}}$ | $\Delta E_{\text{disp}}$ | $\Delta E_{\text{orb}}$ | $\Delta E_{\text{int}}$ |
|-----------------------------------|---------------------------|----------------------------|--------------------------|-------------------------|-------------------------|
| Cl <sub>2</sub>                   | 264.00                    | -150.88                    | -4.98                    | -187.00                 | -78.86                  |
| Br <sub>2</sub>                   | 185.77                    | -120.47                    | -6.30                    | -124.31                 | -65.30                  |
| I <sub>2</sub>                    | 143.38                    | -100.43                    | -7.59                    | -86.87                  | -51.52                  |
| ClF                               | 238.36                    | -140.27                    | -4.73                    | -172.42                 | -79.05                  |
| BrF                               | 171.32                    | -117.39                    | -5.98                    | -116.99                 | -69.04                  |
| IF                                | 138.10                    | -104.23                    | -7.24                    | -84.91                  | -58.29                  |
| BrCl                              | 183.53                    | -120.91                    | -6.14                    | -123.93                 | -67.45                  |
| ICl                               | 145.72                    | -106.03                    | -7.36                    | -90.16                  | -57.85                  |
| ClNC                              | 828.33                    | -294.15                    | -6.75                    | -786.17                 | -258.73                 |
| BrNC                              | 207.62                    | -136.46                    | -6.08                    | -140.64                 | -75.55                  |
| INC                               | 154.17                    | -113.10                    | -7.34                    | -95.14                  | -61.41                  |
| ClOH                              | 167.23                    | -97.83                     | -4.88                    | -110.70                 | -46.17                  |
| BrOH                              | 125.20                    | -84.28                     | -6.02                    | -78.94                  | -44.04                  |
| IOH                               | 109.14                    | -80.33                     | -7.19                    | -62.53                  | -40.91                  |
| ClCN                              | 38.36                     | -27.20                     | -4.42                    | -19.47                  | -12.72                  |
| BrCN                              | 73.61                     | -53.50                     | -5.87                    | -44.50                  | -30.26                  |
| ICN                               | 95.13                     | -72.10                     | -7.20                    | -54.50                  | -38.67                  |
| ClNH <sub>2</sub>                 | 56.65                     | -33.28                     | -4.20                    | -33.37                  | -14.20                  |
| BrNH <sub>2</sub>                 | 70.41                     | -46.38                     | -5.33                    | -40.93                  | -22.23                  |
| INH <sub>2</sub>                  | 76.86                     | -54.55                     | -6.44                    | -41.28                  | -25.41                  |
| ClCF <sub>3</sub>                 | 14.28                     | -10.21                     | -3.83                    | -7.14                   | -6.90                   |
| BrCF <sub>3</sub>                 | 33.92                     | -24.57                     | -5.41                    | -19.27                  | -15.32                  |
| ICF <sub>3</sub>                  | 68.13                     | -50.30                     | -7.05                    | -37.16                  | -26.38                  |
| ClC <sub>6</sub> F <sub>5</sub>   | 14.85                     | -10.09                     | -4.46                    | -7.74                   | -7.44                   |
| BrC <sub>6</sub> F <sub>5</sub>   | 58.70                     | -40.69                     | -6.68                    | -33.61                  | -22.27                  |
| IC <sub>6</sub> F <sub>5</sub>    | 85.63                     | -62.22                     | -7.79                    | -46.92                  | -31.30                  |
| ClC <sub>5</sub> H <sub>4</sub> N | 5.74                      | -3.39                      | -3.17                    | -2.52                   | -3.35                   |
| BrC <sub>5</sub> H <sub>4</sub> N | 14.85                     | -10.35                     | -4.92                    | -7.85                   | -8.26                   |
| IC <sub>5</sub> H <sub>4</sub> N  | 33.94                     | -24.68                     | -6.54                    | -17.25                  | -14.54                  |

## Coordinates of Monomers and Dyads

### Monomers

Cl<sub>2</sub>

|    |            |            |             |
|----|------------|------------|-------------|
| Cl | 0.00000000 | 0.00000000 | 1.00828300  |
| Cl | 0.00000000 | 0.00000000 | -1.00828300 |

Br<sub>2</sub>

|    |            |            |             |
|----|------------|------------|-------------|
| Br | 0.00000000 | 0.00000000 | 1.15897700  |
| Br | 0.00000000 | 0.00000000 | -1.15897700 |

I<sub>2</sub>

|   |            |            |             |
|---|------------|------------|-------------|
| I | 0.00000000 | 0.00000000 | 1.34645100  |
| I | 0.00000000 | 0.00000000 | -1.34645100 |

ClF

|    |            |            |             |
|----|------------|------------|-------------|
| F  | 0.00000000 | 0.00000000 | -1.08256000 |
| Cl | 0.00000000 | 0.00000000 | 0.57312000  |

BrF

|    |            |            |             |
|----|------------|------------|-------------|
| F  | 0.00000000 | 0.00000000 | -1.42363200 |
| Br | 0.00000000 | 0.00000000 | 0.36607700  |

IF

|   |            |            |             |
|---|------------|------------|-------------|
| F | 0.00000000 | 0.00000000 | -1.65784300 |
| I | 0.00000000 | 0.00000000 | 0.28152100  |

BrCl

|    |            |            |             |
|----|------------|------------|-------------|
| Br | 0.00000000 | 0.00000000 | 0.70886600  |
| Cl | 0.00000000 | 0.00000000 | -1.45942900 |

ICl

|    |            |            |             |
|----|------------|------------|-------------|
| Cl | 0.00000000 | 0.00000000 | -1.77746600 |
| I  | 0.00000000 | 0.00000000 | 0.57013000  |

CINC

|    |            |            |             |
|----|------------|------------|-------------|
| N  | 0.00000000 | 0.00000000 | -0.68772900 |
| C  | 0.00000000 | 0.00000000 | -1.87624800 |
| Cl | 0.00000000 | 0.00000000 | 0.94538800  |

BrNC

|    |            |            |             |
|----|------------|------------|-------------|
| N  | 0.00000000 | 0.00000000 | -1.16301700 |
| C  | 0.00000000 | 0.00000000 | -2.35094400 |
| Br | 0.00000000 | 0.00000000 | 0.63562200  |

INC  
N 0.00000000 0.00000000 -1.48855600  
C 0.00000000 0.00000000 -2.67610600  
I 0.00000000 0.00000000 0.49955700

HOCl  
O 0.03683500 1.11458600 0.00000000  
H -0.92087600 1.32005600 0.00000000  
Cl 0.03683500 -0.60216100 0.00000000

HOBr  
O 0.02173500 1.47316300 0.00000000  
H -0.93461000 1.68061800 0.00000000  
Br 0.02173500 -0.38474100 0.00000000

HOI  
O 0.01531300 1.71843900 0.00000000  
H -0.93406700 1.95215500 0.00000000  
I 0.01531300 -0.29622000 0.00000000

ClCN  
C 0.00000000 0.65333200 0.00000000  
N -0.00321800 1.82134400 0.00000000  
Cl 0.00132500 -0.98055300 0.00000000

BrCN  
C -0.00055900 1.13886200 0.00000000  
N 0.00047900 2.30694800 0.00000000  
Br 0.00000000 -0.65662300 0.00000000

ICN  
C -0.00139700 1.48060600 0.00000000  
N 0.00119700 2.64918700 0.00000000  
I 0.00000000 -0.51750800 0.00000000

NH<sub>2</sub>Cl  
N -0.04461000 1.14180600 0.00000000  
H 0.53531500 1.37537400 0.81699900  
H 0.53531500 1.37537400 -0.81699900  
Cl -0.04461000 -0.63196400 0.00000000

NH<sub>2</sub>Br  
N -0.02678600 1.52429400 0.00000000  
H 0.56250500 1.74345700 0.81474200  
H 0.56250500 1.74345700 -0.81474200  
Br -0.02678600 -0.40448500 0.00000000

NH<sub>2</sub>I

|   |             |             |             |
|---|-------------|-------------|-------------|
| N | -0.01893600 | 1.79165800  | 0.00000000  |
| H | 0.56808000  | 2.02032700  | 0.81375900  |
| H | 0.56808000  | 2.02032700  | -0.81375900 |
| I | -0.01893600 | -0.31287300 | 0.00000000  |

ClCF<sub>3</sub>

|    |             |             |             |
|----|-------------|-------------|-------------|
| C  | -0.35450500 | 0.00009800  | 0.00000000  |
| F  | -0.81838700 | -0.62970800 | 1.09093500  |
| F  | -0.81838700 | -0.63021500 | -1.09064300 |
| F  | -0.81868800 | 1.25970100  | -0.00029300 |
| Cl | 1.42507000  | 0.00008200  | 0.00000000  |

BrCF<sub>3</sub>

|    |             |             |             |
|----|-------------|-------------|-------------|
| C  | -0.82488200 | 0.00000000  | 0.00009200  |
| F  | -1.28647600 | 1.09270700  | 0.62692800  |
| F  | -1.28647600 | -1.08946400 | 0.63254400  |
| F  | -1.28611200 | -0.00324300 | -1.25971200 |
| Br | 1.13373900  | 0.00000000  | 0.00004600  |

ICF<sub>3</sub>

|   |             |             |             |
|---|-------------|-------------|-------------|
| C | -1.19722400 | -0.00004800 | 0.00000100  |
| F | -1.66372300 | 0.62916200  | -1.09183600 |
| F | -1.66371800 | 0.63110700  | 1.09071400  |
| F | -1.66377500 | -1.26021600 | 0.00112300  |
| I | 0.98310000  | -0.00000300 | 0.00000000  |

C<sub>6</sub>F<sub>5</sub>Cl

|    |             |             |             |
|----|-------------|-------------|-------------|
| C  | 1.68788900  | 0.00000900  | -0.00001600 |
| C  | 0.98794300  | -1.21027700 | -0.00003000 |
| C  | -0.40973400 | -1.20651100 | 0.00000100  |
| C  | -1.12291800 | 0.00001500  | -0.00002000 |
| C  | -0.40973700 | 1.20649600  | -0.00003800 |
| C  | 0.98797600  | 1.21027100  | -0.00000400 |
| F  | 1.65960100  | -2.37136600 | 0.00002300  |
| F  | 3.02775500  | -0.00004300 | 0.00000600  |
| F  | 1.65956500  | 2.37139600  | 0.00001200  |
| F  | -1.06011100 | 2.37818800  | 0.00001600  |
| F  | -1.06016500 | -2.37816500 | 0.00000000  |
| Cl | -2.84519500 | -0.00000700 | 0.00000800  |

C<sub>6</sub>F<sub>5</sub>Br

|   |            |             |             |
|---|------------|-------------|-------------|
| C | 2.17727000 | 0.00000600  | -0.00000500 |
| C | 1.47754600 | -1.21034300 | -0.00001100 |
| C | 0.07962900 | -1.20572700 | 0.00000000  |

|    |             |             |             |
|----|-------------|-------------|-------------|
| C  | -0.63150500 | 0.00002200  | -0.00000700 |
| C  | 0.07963400  | 1.20571400  | -0.00001500 |
| C  | 1.47759500  | 1.21033300  | -0.00000100 |
| F  | 2.14982400  | -2.37125400 | 0.00000500  |
| F  | 3.51699000  | -0.00005800 | 0.00000400  |
| F  | 2.14980200  | 2.37127800  | 0.00000400  |
| F  | -0.56606400 | 2.38068200  | 0.00000500  |
| F  | -0.56614100 | -2.38064800 | 0.00000200  |
| Br | -2.51773500 | -0.00000100 | 0.00000100  |

C<sub>6</sub>F<sub>5</sub>I

|   |             |             |             |
|---|-------------|-------------|-------------|
| C | 2.59669600  | 0.00000500  | -0.00000600 |
| C | 1.89693000  | -1.21030100 | -0.00001600 |
| C | 0.49900100  | -1.20326600 | 0.00000100  |
| C | -0.21460900 | 0.00002200  | -0.00000900 |
| C | 0.49901000  | 1.20325600  | -0.00002000 |
| C | 1.89697800  | 1.21029300  | 0.00000000  |
| F | 2.57020200  | -2.37110800 | 0.00000700  |
| F | 3.93633100  | -0.00005700 | 0.00000500  |
| F | 2.57018600  | 2.37113000  | 0.00000600  |
| F | -0.14187400 | 2.38294900  | 0.00000600  |
| F | -0.14194700 | -2.38291700 | 0.00000400  |
| I | -2.30528500 | 0.00000000  | 0.00000100  |

C<sub>5</sub>H<sub>4</sub>NCI

|    |             |             |             |
|----|-------------|-------------|-------------|
| C  | 1.59299600  | -1.14289900 | 0.00002500  |
| C  | 0.19610800  | -1.20569200 | -0.00003900 |
| C  | -0.50566500 | 0.00018600  | -0.00014900 |
| C  | 0.19628900  | 1.20585300  | -0.00004300 |
| C  | 1.59321900  | 1.14270500  | 0.00003000  |
| N  | 2.29760400  | -0.00013000 | 0.00002000  |
| H  | 2.17555700  | -2.06950300 | 0.00008400  |
| H  | -0.32568000 | -2.16271300 | 0.00000200  |
| H  | -0.32511700 | 2.16308700  | -0.00003900 |
| H  | 2.17591500  | 2.06923200  | 0.00012600  |
| Cl | -2.24832900 | -0.00000600 | 0.00004400  |

C<sub>5</sub>H<sub>4</sub>NBr

|   |             |             |             |
|---|-------------|-------------|-------------|
| C | -2.20103900 | -1.14254200 | -0.00000900 |
| C | -0.80350700 | -1.20595700 | 0.00002200  |
| C | -0.10342700 | 0.00015900  | 0.00007700  |
| C | -0.80365500 | 1.20606700  | 0.00003500  |
| C | -2.20123200 | 1.14238700  | -0.00001400 |
| N | -2.90542100 | -0.00010100 | -0.00003000 |
| H | -2.78269200 | -2.06971000 | -0.00000100 |
| H | -0.28579800 | -2.16506000 | -0.00001200 |

|    |             |             |             |
|----|-------------|-------------|-------------|
| H  | -0.28621800 | 2.16534600  | 0.00000100  |
| H  | -2.78297400 | 2.06950300  | -0.00004400 |
| Br | 1.80436500  | -0.00000100 | -0.00001100 |

C<sub>5</sub>H<sub>4</sub>NI

|   |             |             |             |
|---|-------------|-------------|-------------|
| C | -2.66511500 | -1.14205900 | -0.00002500 |
| C | -1.26671500 | -1.20508300 | 0.00004000  |
| C | -0.56297500 | 0.00016400  | 0.00012100  |
| C | -1.26691300 | 1.20518300  | 0.00004100  |
| C | -2.66535100 | 1.14190500  | -0.00001900 |
| N | -3.36946000 | -0.00011800 | -0.00001800 |
| H | -3.24627600 | -2.06988300 | -0.00009500 |
| H | -0.75563000 | -2.16777800 | -0.00004000 |
| H | -0.75604900 | 2.16802100  | -0.00005100 |
| H | -3.24662800 | 2.06965900  | -0.00010700 |
| I | 1.55006100  | 0.00000300  | -0.00001000 |

C(NHC<sub>Me</sub>)<sub>2</sub>

|   |             |             |             |
|---|-------------|-------------|-------------|
| C | 0.00000800  | -0.79373600 | -0.00006300 |
| C | 3.09217900  | 0.97713200  | 0.69153300  |
| C | 3.53175400  | -0.06707100 | -0.05856500 |
| H | 3.64585500  | 1.77533000  | 1.17289200  |
| H | 4.53778200  | -0.33263800 | -0.36266400 |
| C | 1.24050200  | -0.23724600 | 0.04988200  |
| N | 1.69698300  | 0.91421800  | 0.73257400  |
| N | 2.42271000  | -0.80264400 | -0.45795200 |
| C | 0.85854400  | 1.62971400  | 1.66991100  |
| H | 0.01409500  | 2.12082600  | 1.16341100  |
| H | 0.44029000  | 0.93638000  | 2.42095900  |
| H | 1.46049000  | 2.39523400  | 2.17626900  |
| C | 2.42390000  | -2.01773700 | -1.23861600 |
| H | 1.52043600  | -2.58282200 | -0.96069300 |
| H | 2.38355600  | -1.81483500 | -2.32271000 |
| H | 3.32513800  | -2.60700000 | -1.01630800 |
| C | -3.09221800 | 0.97720400  | -0.69141300 |
| C | -3.53177600 | -0.06707500 | 0.05859800  |
| H | -3.64588000 | 1.77541300  | -1.17276200 |
| H | -4.53780700 | -0.33268700 | 0.36264500  |
| C | -1.24054500 | -0.23740200 | -0.05018600 |
| N | -1.69704500 | 0.91407000  | -0.73277400 |
| C | -0.85846600 | 1.63015800  | -1.66950800 |
| H | -0.01533200 | 2.12293800  | -1.16239500 |
| H | -0.43827900 | 0.93681700  | -2.41944800 |
| H | -1.46091300 | 2.39436400  | -2.17725000 |
| C | -2.42384400 | -2.01767600 | 1.23869500  |
| H | -2.38323200 | -1.81438800 | 2.32271400  |

|   |             |             |            |
|---|-------------|-------------|------------|
| H | -3.32517500 | -2.60696000 | 1.01681500 |
| H | -1.52049200 | -2.58294100 | 0.96078400 |
| N | -2.42275600 | -0.80287700 | 0.45760100 |

### Dimers

#### C(NHC<sub>Me</sub>)<sub>2</sub>-Cl<sub>2</sub>

|    |             |             |             |
|----|-------------|-------------|-------------|
| Cl | -1.87392000 | 0.00245100  | 0.00066300  |
| Cl | -4.46459700 | 0.00438900  | -0.00030000 |
| C  | 0.00342000  | 0.00032200  | 0.00071300  |
| C  | 2.04441200  | -2.89140900 | 0.82187000  |
| C  | 1.05034100  | -3.46779100 | 0.09643300  |
| H  | 2.89902600  | -3.33058500 | 1.32236500  |
| H  | 0.87981000  | -4.50722700 | -0.15720900 |
| C  | 0.64197100  | -1.23784200 | 0.12370900  |
| N  | 1.79919200  | -1.52081900 | 0.84620900  |
| N  | 0.19757600  | -2.46478100 | -0.34078400 |
| C  | 2.46095300  | -0.57215900 | 1.72307800  |
| H  | 3.13421700  | 0.10471500  | 1.17479800  |
| H  | 1.69897800  | 0.03639900  | 2.23322800  |
| H  | 3.04427300  | -1.12646700 | 2.46832400  |
| C  | -0.91865600 | -2.67891200 | -1.26068000 |
| H  | -1.88525400 | -2.60334800 | -0.74639200 |
| H  | -0.89725300 | -1.91558400 | -2.04912600 |
| H  | -0.79924400 | -3.67361400 | -1.70828300 |
| C  | 2.05173900  | 2.88626300  | -0.82272000 |
| C  | 1.05944100  | 3.46551500  | -0.09716500 |
| H  | 2.90750900  | 3.32288200  | -1.32346500 |
| H  | 0.89192100  | 4.50549000  | 0.15629700  |
| C  | 0.64545600  | 1.23658000  | -0.12302300 |
| N  | 1.80317700  | 1.51617200  | -0.84597800 |
| C  | 2.46142800  | 0.56564900  | -1.72354500 |
| H  | 3.13171000  | -0.11443700 | -1.17562800 |
| H  | 1.69727500  | -0.03935800 | -2.23469500 |
| H  | 3.04731400  | 1.11836100  | -2.46794700 |
| C  | -0.91150900 | 2.68247400  | 1.26048500  |
| H  | -0.89285300 | 1.91921800  | 2.04902800  |
| H  | -0.78948400 | 3.67698500  | 1.70782000  |
| H  | -1.87804500 | 2.60967900  | 0.74554000  |
| N  | 0.20447000  | 2.46492400  | 0.34116100  |

#### C(NHC<sub>Me</sub>)<sub>2</sub>-Br<sub>2</sub>

|    |             |             |            |
|----|-------------|-------------|------------|
| Br | -1.36934500 | 0.00058200  | 0.00011200 |
| Br | -4.11799500 | 0.00037800  | 0.00002700 |
| C  | 0.73953400  | 0.00013200  | 0.00002100 |
| C  | 2.80375300  | -2.85583300 | 0.88566100 |
| C  | 1.85084900  | -3.45280500 | 0.12285000 |

|   |             |             |             |
|---|-------------|-------------|-------------|
| H | 3.64804000  | -3.27747000 | 1.41793300  |
| H | 1.71176800  | -4.49536200 | -0.13703300 |
| C | 1.38853300  | -1.22803600 | 0.13973900  |
| N | 2.52704300  | -1.49227100 | 0.90183600  |
| N | 0.99527000  | -2.46581800 | -0.34550700 |
| C | 3.15930900  | -0.52387100 | 1.77783100  |
| H | 3.84367300  | 0.14589500  | 1.23430300  |
| H | 2.37978600  | 0.08932700  | 2.25434200  |
| H | 3.72495300  | -1.05987900 | 2.54978900  |
| C | -0.06940700 | -2.70103200 | -1.31605200 |
| H | -1.05136100 | -2.76545400 | -0.82968800 |
| H | -0.10204800 | -1.86762800 | -2.02879500 |
| H | 0.15362900  | -3.63516200 | -1.84784300 |
| C | 2.80665400  | 2.85406500  | -0.88526000 |
| C | 1.85368700  | 3.45213500  | -0.12343600 |
| H | 3.65173200  | 3.27477700  | -1.41700900 |
| H | 1.71527400  | 4.49491300  | 0.13591300  |
| C | 1.38952300  | 1.22772200  | -0.13969700 |
| N | 2.52891700  | 1.49067300  | -0.90098700 |
| C | 3.16052800  | 0.52163000  | -1.77675700 |
| H | 3.84217900  | -0.15035800 | -1.23258600 |
| H | 2.38056400  | -0.08922400 | -2.25559600 |
| H | 3.72906400  | 1.05712000  | -2.54693800 |
| C | -0.06813300 | 2.70261400  | 1.31453900  |
| H | -0.10089600 | 1.87039300  | 2.02866800  |
| H | 0.15456900  | 3.63765700  | 1.84484800  |
| H | -1.04993200 | 2.76611100  | 0.82780000  |
| N | 0.99690000  | 2.46604900  | 0.34471000  |

C(NHC<sub>Me</sub>)<sub>2</sub>-I<sub>2</sub>

|   |             |             |             |
|---|-------------|-------------|-------------|
| I | -0.99218900 | 0.00009000  | 0.00002700  |
| I | -4.01425000 | 0.00002900  | -0.00000100 |
| C | 1.36984900  | 0.00010900  | 0.00012000  |
| C | 3.46137000  | -2.81914200 | 0.94733800  |
| C | 2.54962300  | -3.43579500 | 0.15112900  |
| H | 4.29377700  | -3.22381100 | 1.51074800  |
| H | 2.44170600  | -4.48082200 | -0.11358300 |
| C | 2.03573300  | -1.21735700 | 0.15482000  |
| N | 3.15528100  | -1.46250900 | 0.95353300  |
| N | 1.69100100  | -2.46487800 | -0.34647200 |
| C | 3.75190700  | -0.47816000 | 1.83608800  |
| H | 4.44125000  | 0.19505300  | 1.30321600  |
| H | 2.95203800  | 0.12865400  | 2.28608500  |
| H | 4.30446400  | -0.99914300 | 2.62772200  |
| C | 0.68333500  | -2.71894900 | -1.36868400 |
| H | -0.30529900 | -2.90017000 | -0.92608400 |

|   |             |             |             |
|---|-------------|-------------|-------------|
| H | 0.60338000  | -1.84013600 | -2.02048800 |
| H | 0.99864500  | -3.59106300 | -1.95715400 |
| C | 3.46244900  | 2.81858200  | -0.94702300 |
| C | 2.55031900  | 3.43567000  | -0.15161400 |
| H | 4.29530300  | 3.22288600  | -1.51003400 |
| H | 2.44242800  | 4.48081200  | 0.11265700  |
| C | 2.03603600  | 1.21730000  | -0.15480000 |
| N | 3.15617300  | 1.46195500  | -0.95287900 |
| C | 3.75283700  | 0.47743400  | -1.83521300 |
| H | 4.44164400  | -0.19611800 | -1.30207900 |
| H | 2.95299900  | -0.12901400 | -2.28577200 |
| H | 4.30602400  | 0.99826200  | -2.62650900 |
| C | 0.68335500  | 2.71971000  | 1.36775300  |
| H | 0.60326100  | 1.84124300  | 2.02000100  |
| H | 0.99854500  | 3.59217600  | 1.95576000  |
| H | -0.30519700 | 2.90084600  | 0.92494700  |
| N | 1.69117600  | 2.46509100  | 0.34577800  |

C(NHC<sub>Me</sub>)<sub>2</sub>-ClF

|    |             |             |             |
|----|-------------|-------------|-------------|
| Cl | 0.00000500  | 2.20255500  | 0.00013100  |
| F  | 0.00035800  | 4.24613800  | 0.00014300  |
| C  | 0.00005700  | 0.30230500  | 0.00001100  |
| C  | -2.88024500 | -1.76131500 | 0.81912300  |
| C  | -3.46239300 | -0.76354200 | 0.10377400  |
| H  | -3.31536700 | -2.61904600 | 1.31793000  |
| H  | -4.50341600 | -0.59532800 | -0.14509300 |
| C  | -1.23076500 | -0.34754200 | 0.12236200  |
| N  | -1.50922300 | -1.51388500 | 0.83645100  |
| N  | -2.46426400 | 0.09700000  | -0.32922400 |
| C  | -0.55822900 | -2.17273200 | 1.71179500  |
| H  | 0.12046800  | -2.84467800 | 1.16373600  |
| H  | 0.05037100  | -1.40834900 | 2.21897600  |
| H  | -1.10931900 | -2.75675800 | 2.45921200  |
| C  | -2.68162000 | 1.20716200  | -1.25456200 |
| H  | -2.57525200 | 2.17570600  | -0.75114300 |
| H  | -1.93564300 | 1.16627900  | -2.05937700 |
| H  | -3.68805800 | 1.09945400  | -1.67907400 |
| C  | 2.87993700  | -1.76196000 | -0.81896000 |
| C  | 3.46233600  | -0.76405900 | -0.10400200 |
| H  | 3.31479600  | -2.62015300 | -1.31720600 |
| H  | 4.50342700  | -0.59596700 | 0.14466400  |
| C  | 1.23076300  | -0.34782700 | -0.12220300 |
| N  | 1.50889300  | -1.51447100 | -0.83596200 |
| C  | 0.55777400  | -2.17277200 | -1.71164400 |
| H  | -0.12172300 | -2.84401000 | -1.16372500 |
| H  | -0.04995400 | -1.40802100 | -2.21932300 |

|   |            |             |             |
|---|------------|-------------|-------------|
| H | 1.10877500 | -2.75747600 | -2.45859100 |
| C | 2.68211300 | 1.20732700  | 1.25374000  |
| H | 1.93662300 | 1.16669400  | 2.05901200  |
| H | 3.68878300 | 1.10004300  | 1.67780800  |
| H | 2.57523400 | 2.17557500  | 0.74986400  |
| N | 2.46439100 | 0.09665400  | 0.32905200  |

C(NHC<sub>Me</sub>)<sub>2</sub>-BrF

|    |             |             |             |
|----|-------------|-------------|-------------|
| Br | 2.12474600  | -0.00108700 | -0.00000900 |
| F  | 4.19218700  | -0.00220500 | 0.00000400  |
| C  | 0.00838800  | -0.00000800 | 0.00001200  |
| C  | -2.08901900 | 2.84033600  | 0.87694700  |
| C  | -1.12737200 | 3.44624600  | 0.13293800  |
| H  | -2.94110900 | 3.25515800  | 1.40216400  |
| H  | -0.98981000 | 4.49111100  | -0.11855300 |
| C  | -0.65542300 | 1.22081400  | 0.13823900  |
| N  | -1.80908300 | 1.47641500  | 0.88409300  |
| N  | -0.25980600 | 2.46640900  | -0.32838600 |
| C  | -2.44104300 | 0.50467800  | 1.75571500  |
| H  | -3.12068200 | -0.16790100 | 1.20934500  |
| H  | -1.66061100 | -0.10726700 | 2.23298700  |
| H  | -3.01155100 | 1.03683500  | 2.52708600  |
| C  | 0.80801800  | 2.71040600  | -1.29257300 |
| H  | 1.78716100  | 2.77404900  | -0.80137100 |
| H  | 0.84809200  | 1.87875300  | -2.00706000 |
| H  | 0.58323700  | 3.64582500  | -1.82222500 |
| C  | -2.09200500 | -2.83817400 | -0.87688900 |
| C  | -1.13098100 | -3.44507500 | -0.13288600 |
| H  | -2.94455900 | -3.25211300 | -1.40205200 |
| H  | -0.99450600 | -4.49007800 | 0.11863000  |
| C  | -0.65668200 | -1.22013800 | -0.13824900 |
| N  | -1.81062000 | -1.47454500 | -0.88410900 |
| C  | -2.44147500 | -0.50220000 | -1.75585100 |
| H  | -3.12130200 | 0.17044700  | -1.20978300 |
| H  | -1.66034900 | 0.10959700  | -2.23216300 |
| H  | -3.01152600 | -1.03378000 | -2.52796300 |
| C  | 0.80513200  | -2.71120900 | 1.29264800  |
| H  | 0.84614400  | -1.87948300 | 2.00700100  |
| H  | 0.57930800  | -3.64627800 | 1.82247200  |
| H  | 1.78423700  | -2.77603400 | 0.80152500  |
| N  | -0.26237400 | -2.46613800 | 0.32839200  |

C(NHC<sub>Me</sub>)<sub>2</sub>-IF

|   |             |             |             |
|---|-------------|-------------|-------------|
| I | -2.07249700 | -0.00027900 | -0.00000500 |
| F | -4.20288600 | -0.00045300 | 0.00000800  |
| C | 0.27213400  | -0.00001800 | 0.00006000  |

|   |             |             |             |
|---|-------------|-------------|-------------|
| C | 2.41125900  | -2.79331500 | 0.93812400  |
| C | 1.48948600  | -3.42500900 | 0.16623100  |
| H | 3.25593200  | -3.18556800 | 1.49200100  |
| H | 1.38590400  | -4.47341400 | -0.08678400 |
| C | 0.95685200  | -1.20929300 | 0.15508100  |
| N | 2.09577300  | -1.43785700 | 0.93357300  |
| N | 0.61275400  | -2.46659300 | -0.32375900 |
| C | 2.69234800  | -0.44625800 | 1.80746500  |
| H | 3.37674000  | 0.22743200  | 1.26845400  |
| H | 1.89160300  | 0.16062900  | 2.25617700  |
| H | 3.25002500  | -0.96010100 | 2.60048600  |
| C | -0.40224100 | -2.73857200 | -1.33398600 |
| H | -1.38245000 | -2.93270000 | -0.87903600 |
| H | -0.50518500 | -1.86110800 | -1.98406200 |
| H | -0.07885500 | -3.60641500 | -1.92519200 |
| C | 2.41011200  | 2.79408700  | -0.93819700 |
| C | 1.48813000  | 3.42545100  | -0.16628900 |
| H | 3.25455800  | 3.18666800  | -1.49218700 |
| H | 1.38420400  | 4.47380400  | 0.08679700  |
| C | 0.95640000  | 1.20951300  | -0.15499600 |
| N | 2.09522200  | 1.43846700  | -0.93352700 |
| C | 2.69165400  | 0.44720300  | -1.80793500 |
| H | 3.37674100  | -0.22621300 | -1.26946400 |
| H | 1.89084700  | -0.16000800 | -2.25610300 |
| H | 3.24854100  | 0.96134900  | -2.60131400 |
| C | -0.40293100 | 2.73809500  | 1.33443100  |
| H | -0.50525600 | 1.86040300  | 1.98430800  |
| H | -0.07973300 | 3.60590600  | 1.92578600  |
| H | -1.38336900 | 2.93186000  | 0.87985900  |
| N | 0.61179600  | 2.46670300  | 0.32378700  |

C(NHC<sub>Me</sub>)<sub>2</sub>-BrCl

|    |             |             |             |
|----|-------------|-------------|-------------|
| Cl | -4.42712800 | -0.00201300 | 0.00007400  |
| Br | -1.84682600 | -0.00138500 | -0.00015700 |
| C  | 0.26060700  | -0.00015000 | 0.00004400  |
| C  | 2.33730600  | -2.84984800 | 0.88143300  |
| C  | 1.38109500  | -3.45034900 | 0.12576900  |
| H  | 3.18490700  | -3.26864300 | 1.41067500  |
| H  | 1.24265200  | -4.49375700 | -0.13104900 |
| C  | 0.91481400  | -1.22596000 | 0.13897900  |
| N  | 2.05880700  | -1.48630900 | 0.89481300  |
| N  | 0.52068200  | -2.46620700 | -0.33983200 |
| C  | 2.69085200  | -0.51635500 | 1.76911900  |
| H  | 3.37036100  | 0.15684900  | 1.22369900  |
| H  | 1.91092200  | 0.09363100  | 2.24927600  |
| H  | 3.26173500  | -1.05086300 | 2.53830700  |

|   |             |             |             |
|---|-------------|-------------|-------------|
| C | -0.54613400 | -2.70542500 | -1.30713700 |
| H | -1.52761100 | -2.76213600 | -0.81914600 |
| H | -0.57713100 | -1.87738400 | -2.02626500 |
| H | -0.32654500 | -3.64439700 | -1.83191400 |
| C | 2.33217500  | 2.85322700  | -0.88156800 |
| C | 1.37527700  | 3.45192600  | -0.12533600 |
| H | 3.17897100  | 3.27357300  | -1.41087000 |
| H | 1.23521800  | 4.49505600  | 0.13174400  |
| C | 0.91263800  | 1.22680000  | -0.13898000 |
| N | 2.05585500  | 1.48926100  | -0.89526600 |
| C | 2.68931100  | 0.52054300  | -1.76992300 |
| H | 3.37240100  | -0.14971700 | -1.22532400 |
| H | 1.91029200  | -0.09260200 | -2.24748300 |
| H | 3.25651800  | 1.05612200  | -2.54109600 |
| C | -0.55015200 | 2.70368600  | 1.30808900  |
| H | -0.57978700 | 1.87525300  | 2.02683200  |
| H | -0.33146600 | 3.64264800  | 1.83326900  |
| H | -1.53195400 | 2.75939500  | 0.82064900  |
| N | 0.51663600  | 2.46627100  | 0.34028400  |

C(NHC<sub>Me</sub>)<sub>2</sub>-ICl

|    |             |             |             |
|----|-------------|-------------|-------------|
| Cl | -4.47086600 | 0.00008100  | -0.00006700 |
| I  | -1.82600000 | 0.00035600  | 0.00004000  |
| C  | 0.51320700  | 0.00006100  | 0.00010100  |
| C  | 2.63131500  | -2.80469500 | 0.94137100  |
| C  | 1.71323000  | -3.43010700 | 0.15975600  |
| H  | 3.47135800  | -3.20198100 | 1.49863900  |
| H  | 1.60740100  | -4.47709700 | -0.09799000 |
| C  | 1.18882900  | -1.21407100 | 0.15551100  |
| N  | 2.31921300  | -1.44893600 | 0.94216500  |
| N  | 0.84373300  | -2.46647500 | -0.33295200 |
| C  | 2.91663200  | -0.46027200 | 1.81940300  |
| H  | 3.60347900  | 0.21240000  | 1.28253200  |
| H  | 2.11675300  | 0.14698300  | 2.26884400  |
| H  | 3.47192800  | -0.97734900 | 2.61177900  |
| C  | -0.16918400 | -2.73156600 | -1.34766200 |
| H  | -0.24951900 | -1.86188900 | -2.01152900 |
| H  | 0.14194300  | -3.61289500 | -1.92464100 |
| H  | -1.15640000 | -2.90237200 | -0.89834200 |
| C  | 2.63226700  | 2.80403500  | -0.94144500 |
| C  | 1.71434300  | 3.42975800  | -0.15987500 |
| H  | 3.47256800  | 3.20102600  | -1.49853500 |
| H  | 1.60881200  | 4.47680400  | 0.09776700  |
| C  | 1.18943100  | 1.21384400  | -0.15542100 |
| N  | 2.31991200  | 1.44833000  | -0.94201200 |
| C  | 2.91693700  | 0.45940700  | -1.81923200 |

|   |             |             |             |
|---|-------------|-------------|-------------|
| H | 3.60202100  | -0.21472200 | -1.28195800 |
| H | 2.11678700  | -0.14630400 | -2.27030000 |
| H | 3.47411000  | 0.97626700  | -2.61042200 |
| C | -0.16849000 | 2.73165100  | 1.34736000  |
| H | -0.24915400 | 1.86201700  | 2.01123200  |
| H | 0.14250300  | 3.61302500  | 1.92432900  |
| H | -1.15546600 | 2.90246100  | 0.89750100  |
| N | 0.84464100  | 2.46637800  | 0.33293000  |

C(NHC<sub>Me</sub>)<sub>2</sub>-ClNC

|    |             |             |             |
|----|-------------|-------------|-------------|
| Cl | 0.97606500  | -1.71544400 | 0.09607800  |
| N  | 3.47449300  | -3.06087600 | 0.08897600  |
| C  | 4.09119000  | -2.09324500 | -0.19152800 |
| C  | -0.06011600 | -0.27610900 | 0.02097800  |
| C  | 1.24143200  | 3.01447300  | 0.85732000  |
| C  | 2.24567600  | 2.52481100  | 0.07755900  |
| H  | 1.14716600  | 3.95851100  | 1.38027600  |
| H  | 3.19631600  | 2.96275600  | -0.20176000 |
| C  | 0.63342800  | 0.95719800  | 0.13695000  |
| N  | 0.24870600  | 2.04585000  | 0.90268700  |
| N  | 1.86640600  | 1.27597100  | -0.38123500 |
| C  | -0.89550400 | 2.06117900  | 1.79844600  |
| H  | -1.83271500 | 2.29122800  | 1.26909700  |
| H  | -0.99328200 | 1.07238700  | 2.26923300  |
| H  | -0.72663700 | 2.81895500  | 2.57266300  |
| C  | 2.66304400  | 0.46350800  | -1.30107000 |
| H  | 3.25769900  | -0.34217000 | -0.78027100 |
| H  | 1.99461600  | -0.01918700 | -2.02479900 |
| H  | 3.35057500  | 1.13853700  | -1.82593100 |
| C  | -3.57829200 | -0.02241600 | -0.84317000 |
| C  | -3.56447500 | -1.20072100 | -0.16977400 |
| H  | -4.39147500 | 0.50421400  | -1.32781300 |
| H  | -4.36795400 | -1.89380300 | 0.04885300  |
| C  | -1.44451600 | -0.39893400 | -0.14943600 |
| N  | -2.27606100 | 0.47618200  | -0.84250100 |
| C  | -1.80233600 | 1.55122300  | -1.69746100 |
| H  | -1.56394200 | 2.46317600  | -1.12925000 |
| H  | -0.89333000 | 1.22133700  | -2.22298900 |
| H  | -2.58173500 | 1.78527300  | -2.43262300 |
| C  | -1.88617400 | -2.51102300 | 1.17597300  |
| H  | -2.80574000 | -2.98448300 | 1.54076200  |
| H  | -1.25420800 | -3.25467200 | 0.67494400  |
| H  | -1.32436600 | -2.10219500 | 2.02665200  |
| N  | -2.26558100 | -1.43384000 | 0.26649100  |

C(NHC<sub>Me</sub>)<sub>2</sub>-BrNC

|    |             |             |             |
|----|-------------|-------------|-------------|
| N  | -4.24351600 | -0.00106500 | -0.00017100 |
| C  | -5.42622400 | -0.00108800 | -0.00004700 |
| Br | -1.91460900 | -0.00065100 | -0.00007200 |
| C  | 0.14715800  | -0.00008900 | 0.00012800  |
| C  | 2.25134500  | -2.83271300 | 0.87966700  |
| C  | 1.29429500  | -3.44404600 | 0.13415000  |
| H  | 3.10675200  | -3.24194000 | 1.40370300  |
| H  | 1.16203900  | -4.48943600 | -0.11776300 |
| C  | 0.81070000  | -1.22523000 | 0.14343200  |
| N  | 1.96043400  | -1.47175600 | 0.89168000  |
| N  | 0.42221800  | -2.46852900 | -0.32803700 |
| C  | 2.58981000  | -0.49665900 | 1.76357400  |
| H  | 3.26870600  | 0.17534300  | 1.21625100  |
| H  | 1.80805100  | 0.11276100  | 2.24090100  |
| H  | 3.16041400  | -1.02762600 | 2.53524200  |
| C  | -0.64730400 | -2.72187300 | -1.28974200 |
| H  | -1.62576000 | -2.78445600 | -0.79670300 |
| H  | -0.68702600 | -1.90005300 | -2.01537400 |
| H  | -0.42303900 | -3.66275700 | -1.80851600 |
| C  | 2.24839700  | 2.83444400  | -0.88035400 |
| C  | 1.29125600  | 3.44486500  | -0.13417400 |
| H  | 3.10302400  | 3.24448000  | -1.40502800 |
| H  | 1.15815500  | 4.49014200  | 0.11776400  |
| C  | 0.80977700  | 1.22561600  | -0.14326500 |
| N  | 1.95866800  | 1.47325500  | -0.89231300 |
| C  | 2.58861000  | 0.49861900  | -1.76431700 |
| H  | 3.26648700  | -0.17415400 | -1.21670600 |
| H  | 1.80722900  | -0.11007300 | -2.24321400 |
| H  | 3.16044900  | 1.03005300  | -2.53472900 |
| C  | -0.64836700 | 2.72066400  | 1.29135500  |
| H  | -0.68671800 | 1.89839400  | 2.01657300  |
| H  | -0.42421800 | 3.66141200  | 1.81041700  |
| H  | -1.62746100 | 2.78273900  | 0.79950600  |
| N  | 0.42041400  | 2.46850900  | 0.32851900  |

C(NHC<sub>Me</sub>)<sub>2</sub>-INC

|   |             |             |             |
|---|-------------|-------------|-------------|
| I | -1.90459300 | 0.00059700  | 0.00034000  |
| N | -4.23549100 | 0.00096800  | -0.00018300 |
| C | -5.41810300 | -0.00358400 | -0.00183900 |
| C | 0.41213900  | -0.00032700 | 0.00056900  |
| C | 2.55245500  | -2.79127100 | 0.94024700  |
| C | 1.63350700  | -3.42491500 | 0.16666500  |
| H | 3.39822300  | -3.18134900 | 1.49388600  |
| H | 1.53199900  | -4.47334000 | -0.08690700 |
| C | 1.09635400  | -1.21250500 | 0.15853500  |

|   |             |             |             |
|---|-------------|-------------|-------------|
| N | 2.23188100  | -1.43744300 | 0.93869000  |
| N | 0.75531300  | -2.46767300 | -0.32359600 |
| C | 2.82823900  | -0.44442100 | 1.81264800  |
| H | 3.50921400  | 0.23086300  | 1.27186900  |
| H | 2.02748800  | 0.15878700  | 2.26565200  |
| H | 3.38962400  | -0.95821000 | 2.60271900  |
| C | -0.25959900 | -2.74272100 | -1.33406000 |
| H | -0.34893900 | -1.87551300 | -1.99995200 |
| H | 0.05594700  | -3.62245300 | -1.91068100 |
| H | -1.24322200 | -2.92271300 | -0.88056000 |
| C | 2.55008700  | 2.79136600  | -0.94232900 |
| C | 1.63260300  | 3.42449300  | -0.16659400 |
| H | 3.39469100  | 3.18176900  | -1.49751100 |
| H | 1.53143300  | 4.47281000  | 0.08757800  |
| C | 1.09581000  | 1.21201500  | -0.15839200 |
| N | 2.22961500  | 1.43751100  | -0.94078900 |
| C | 2.82488300  | 0.44482200  | -1.81585300 |
| H | 3.50925100  | -0.22845800 | -1.27684800 |
| H | 2.02365000  | -0.16048700 | -2.26514600 |
| H | 3.38219700  | 0.95887400  | -2.60864600 |
| C | -0.25675800 | 2.74171200  | 1.33817300  |
| H | -0.34755900 | 1.87242500  | 2.00110700  |
| H | 0.06270500  | 3.61837300  | 1.91739100  |
| H | -1.24079200 | 2.92693100  | 0.88757500  |
| N | 0.75551600  | 2.46693200  | 0.32500000  |

C(NHC<sub>Me</sub>)<sub>2</sub>-HOCl

|    |             |             |             |
|----|-------------|-------------|-------------|
| O  | -0.00509100 | 4.34478500  | -0.07379000 |
| H  | -0.36470800 | 4.50982700  | 0.81846500  |
| Cl | -0.00539800 | 2.29655800  | -0.01386400 |
| C  | 0.00280900  | 0.25189200  | 0.00971100  |
| C  | -2.90681100 | -1.75617000 | 0.84795600  |
| C  | -3.46692000 | -0.78455000 | 0.08031600  |
| H  | -3.35988400 | -2.58949300 | 1.37189300  |
| H  | -4.50182900 | -0.61948000 | -0.19505100 |
| C  | -1.22600200 | -0.38265500 | 0.12505200  |
| N  | -1.53416500 | -1.52212800 | 0.87745600  |
| N  | -2.45175000 | 0.04735300  | -0.37053800 |
| C  | -0.59206300 | -2.17463700 | 1.76407000  |
| H  | 0.07952600  | -2.86376400 | 1.22795800  |
| H  | 0.02629000  | -1.40778800 | 2.25618500  |
| H  | -1.14794600 | -2.73979000 | 2.52272000  |
| C  | -2.63471600 | 1.12352900  | -1.33786200 |
| H  | -2.63865900 | 2.10767100  | -0.85259700 |
| H  | -1.80179800 | 1.11367800  | -2.05273000 |
| H  | -3.58151900 | 0.95161400  | -1.86718100 |

|   |             |             |             |
|---|-------------|-------------|-------------|
| C | 2.91327200  | -1.74908500 | -0.84324200 |
| C | 3.47771200  | -0.76509000 | -0.09517800 |
| H | 3.36420600  | -2.58569500 | -1.36372100 |
| H | 4.51521200  | -0.58952500 | 0.16329100  |
| C | 1.23405000  | -0.37609600 | -0.11559500 |
| N | 1.53894800  | -1.52302200 | -0.85781100 |
| C | 0.59237900  | -2.18825800 | -1.73053800 |
| H | -0.08104300 | -2.86421400 | -1.18036600 |
| H | -0.02315200 | -1.42951400 | -2.23830500 |
| H | 1.14550900  | -2.77035500 | -2.47821200 |
| C | 2.65523600  | 1.16521700  | 1.29727000  |
| H | 1.84433700  | 1.15426800  | 2.03742400  |
| H | 3.61991600  | 1.02037900  | 1.80173900  |
| H | 2.62835200  | 2.13793000  | 0.78989200  |
| N | 2.46353900  | 0.06635500  | 0.35844300  |

C(NHC<sub>Me</sub>)<sub>2</sub>-HOBr

|    |             |             |             |
|----|-------------|-------------|-------------|
| O  | -4.29454000 | 0.00393800  | -0.07302700 |
| H  | -4.48961100 | -0.34040700 | 0.81891100  |
| Br | -2.20005900 | -0.00443700 | -0.00987200 |
| C  | 0.04956200  | 0.00163600  | 0.00930000  |
| C  | 2.10682400  | -2.86346200 | 0.89112100  |
| C  | 1.16096100  | -3.45103900 | 0.11261600  |
| H  | 2.94149400  | -3.29375800 | 1.43194200  |
| H  | 1.02355600  | -4.49117100 | -0.15815800 |
| C  | 0.70309500  | -1.21703800 | 0.13877200  |
| N  | 1.84010200  | -1.49707300 | 0.90774300  |
| N  | 0.31393300  | -2.45675200 | -0.35771000 |
| C  | 2.46800500  | -0.53436600 | 1.78990600  |
| H  | 3.15398500  | 0.13990500  | 1.25308900  |
| H  | 1.68600600  | 0.07859100  | 2.26419700  |
| H  | 3.03147800  | -1.07217900 | 2.56281800  |
| C  | -0.73261300 | -2.67219200 | -1.34817200 |
| H  | -1.71336100 | -2.81754500 | -0.87662000 |
| H  | -0.80438900 | -1.78626400 | -1.99115300 |
| H  | -0.46592800 | -3.55172000 | -1.95043600 |
| C  | 2.09108100  | 2.87305400  | -0.88932400 |
| C  | 1.13798800  | 3.46091200  | -0.12016600 |
| H  | 2.92463800  | 3.30423900  | -1.43110000 |
| H  | 0.99121700  | 4.50248500  | 0.13981500  |
| C  | 0.69517500  | 1.22373200  | -0.12898000 |
| N  | 1.83345300  | 1.50474400  | -0.89545300 |
| C  | 2.46878800  | 0.54107600  | -1.77157500 |
| H  | 3.15153300  | -0.13152800 | -1.22870300 |
| H  | 1.69161200  | -0.07301200 | -2.25206800 |
| H  | 3.03749100  | 1.07882900  | -2.54062100 |

|   |             |            |            |
|---|-------------|------------|------------|
| C | -0.76487000 | 2.68340700 | 1.32882000 |
| H | -0.82235500 | 1.81393500 | 1.99571800 |
| H | -0.52327400 | 3.58461800 | 1.90905200 |
| H | -1.74309200 | 2.79387600 | 0.84260600 |
| N | 0.29585500  | 2.46487700 | 0.35492700 |

C(NHC<sub>Me</sub>)<sub>2</sub>-HOI

|   |             |             |             |
|---|-------------|-------------|-------------|
| O | -4.30529300 | 0.00447100  | -0.07630300 |
| H | -4.54937000 | -0.32529200 | 0.80831900  |
| I | -2.12400500 | -0.00856300 | -0.00681300 |
| C | 0.32891400  | -0.00054300 | 0.00865300  |
| C | 2.45064300  | -2.80694900 | 0.93967400  |
| C | 1.53560300  | -3.42766300 | 0.15089700  |
| H | 3.28708800  | -3.20878400 | 1.49936500  |
| H | 1.43202600  | -4.47328600 | -0.11361400 |
| C | 1.01003600  | -1.20583800 | 0.15427200  |
| N | 2.14331600  | -1.44947700 | 0.94172000  |
| N | 0.66825800  | -2.46068200 | -0.34045500 |
| C | 2.73864500  | -0.46330400 | 1.82071900  |
| H | 3.41893100  | 0.21743300  | 1.28497700  |
| H | 1.93736200  | 0.13869100  | 2.27596100  |
| H | 3.30115200  | -0.98023500 | 2.60853700  |
| C | -0.33783200 | -2.71487300 | -1.36174800 |
| H | -1.31260300 | -2.95968200 | -0.91877300 |
| H | -0.46701800 | -1.80883300 | -1.96643600 |
| H | 0.00750300  | -3.54325700 | -1.99648000 |
| C | 2.40266000  | 2.83391600  | -0.94556500 |
| C | 1.48564300  | 3.44323800  | -0.15026500 |
| H | 3.22779700  | 3.24650600  | -1.51411200 |
| H | 1.36819700  | 4.48798900  | 0.11180600  |
| C | 0.99200500  | 1.21431600  | -0.14497300 |
| N | 2.11462400  | 1.47224600  | -0.94230200 |
| C | 2.71492400  | 0.49352100  | -1.82660800 |
| H | 3.40727700  | -0.17922600 | -1.29634500 |
| H | 1.91751800  | -0.11728700 | -2.27665600 |
| H | 3.26518900  | 1.01783500  | -2.61812200 |
| C | -0.37075100 | 2.70722500  | 1.37251900  |
| H | -0.03655200 | 3.54261800  | 2.00404400  |
| H | -1.34946000 | 2.93592900  | 0.92938800  |
| H | -0.48452300 | 1.80051800  | 1.97944400  |
| N | 0.63682500  | 2.46479200  | 0.35029100  |

C(NHC<sub>Me</sub>)<sub>2</sub>-ClCN

|    |             |            |            |
|----|-------------|------------|------------|
| C  | -3.91314000 | 1.75640900 | 0.23379000 |
| N  | -5.00969300 | 2.13099900 | 0.39429600 |
| Cl | -2.34458000 | 1.22456000 | 0.00492200 |

|   |             |             |             |
|---|-------------|-------------|-------------|
| C | 0.23563300  | 0.12633500  | -0.32520700 |
| C | -0.53950600 | -3.17418700 | 0.98957300  |
| C | -1.25464800 | -3.16851400 | -0.16613700 |
| H | -0.47486000 | -3.92204600 | 1.77146100  |
| H | -1.91578100 | -3.91917000 | -0.58323300 |
| C | -0.11227600 | -1.18137100 | -0.07278700 |
| N | 0.17408200  | -1.97794600 | 1.04781300  |
| N | -1.00078400 | -1.96704800 | -0.81522300 |
| C | 0.87705800  | -1.46990700 | 2.20801100  |
| H | 1.96612500  | -1.42736900 | 2.04856900  |
| H | 0.52684800  | -0.44768800 | 2.42335700  |
| H | 0.66878600  | -2.11930400 | 3.06770800  |
| C | -1.49968800 | -1.58358500 | -2.12033700 |
| H | -1.19799800 | -0.53973500 | -2.28416000 |
| H | -1.06621800 | -2.21350700 | -2.91438700 |
| H | -2.59615000 | -1.66098100 | -2.15632500 |
| C | 3.73503900  | 1.11387200  | -0.23061100 |
| C | 3.10833600  | 2.29847100  | -0.01465600 |
| H | 4.79083500  | 0.88481000  | -0.31882300 |
| H | 3.51839700  | 3.29096300  | 0.13166400  |
| C | 1.47115700  | 0.69558000  | -0.16014200 |
| N | 2.75468100  | 0.12040000  | -0.29105000 |
| C | 2.96549800  | -1.21327900 | -0.81311600 |
| H | 2.68998200  | -1.99235100 | -0.08582200 |
| H | 2.35430500  | -1.36518200 | -1.71901000 |
| H | 4.02605100  | -1.33166800 | -1.06910700 |
| C | 0.70267500  | 3.04952200  | 0.18674800  |
| H | 0.10112300  | 2.86545400  | 1.08994800  |
| H | 1.16901500  | 4.04027300  | 0.25848800  |
| H | 0.02554700  | 3.02325100  | -0.68104500 |
| N | 1.74100200  | 2.05368800  | 0.04220400  |

C(NHC<sub>Me</sub>)<sub>2</sub>-BrCN

|    |             |             |             |
|----|-------------|-------------|-------------|
| Br | -2.18905600 | -0.00163100 | 0.00002100  |
| C  | -4.17885100 | -0.00244900 | -0.00020700 |
| N  | -5.34955500 | -0.00289300 | -0.00028400 |
| C  | 0.26496400  | -0.00018800 | 0.00035200  |
| C  | 2.30370000  | -2.87676700 | 0.89486700  |
| C  | 1.36124500  | -3.45922500 | 0.10930800  |
| H  | 3.13008100  | -3.31294800 | 1.44380900  |
| H  | 1.21875600  | -4.49875200 | -0.16118400 |
| C  | 0.91551800  | -1.21636400 | 0.13281600  |
| N  | 2.04832900  | -1.50792200 | 0.90650300  |
| N  | 0.52515900  | -2.45711300 | -0.36730600 |
| C  | 2.68065900  | -0.54823300 | 1.78864900  |
| H  | 3.35899600  | 0.13141000  | 1.24911500  |

|   |             |             |             |
|---|-------------|-------------|-------------|
| H | 1.90198300  | 0.05942600  | 2.27526400  |
| H | 3.25385100  | -1.08829200 | 2.55274500  |
| C | -0.52832900 | -2.66178100 | -1.34768800 |
| H | -0.66994400 | -1.72971700 | -1.90888500 |
| H | -0.22899600 | -3.46654900 | -2.03364400 |
| H | -1.48412300 | -2.92133900 | -0.87065300 |
| C | 2.29682200  | 2.88071700  | -0.89589500 |
| C | 1.35406400  | 3.46109000  | -0.10914900 |
| H | 3.12160900  | 3.31870900  | -1.44579100 |
| H | 1.20975200  | 4.50027200  | 0.16170800  |
| C | 0.91294000  | 1.21732600  | -0.13259800 |
| N | 2.04424100  | 1.51135400  | -0.90751600 |
| C | 2.67758200  | 0.55308900  | -1.79048800 |
| H | 3.35820900  | -0.12496800 | -1.25184100 |
| H | 1.89961800  | -0.05637200 | -2.27597800 |
| H | 3.24847500  | 1.09442000  | -2.55540500 |
| C | -0.53191100 | 2.65933600  | 1.35020300  |
| H | -0.67182200 | 1.72624500  | 1.91010200  |
| H | -0.23258100 | 3.46337300  | 2.03703700  |
| H | -1.48852100 | 2.91866000  | 0.87469100  |
| N | 0.52057300  | 2.45717500  | 0.36819700  |

C(NHC<sub>Me</sub>)<sub>2</sub>-ICN

|   |             |             |             |
|---|-------------|-------------|-------------|
| I | -2.01244500 | 0.00053200  | 0.00000900  |
| C | -4.23557300 | 0.00079600  | 0.00007100  |
| N | -5.40667900 | 0.00101600  | 0.00004500  |
| C | 0.49714100  | 0.00009400  | -0.00032900 |
| C | 2.59052300  | -2.82596800 | 0.93926100  |
| C | 1.67272600  | -3.43834400 | 0.14770300  |
| H | 3.42053100  | -3.23582300 | 1.50268500  |
| H | 1.55878200  | -4.48309400 | -0.11586600 |
| C | 1.16939600  | -1.21015900 | 0.14962500  |
| N | 2.29691200  | -1.46543100 | 0.93967000  |
| N | 0.81691400  | -2.46160200 | -0.34621300 |
| C | 2.90071500  | -0.48508700 | 1.82041900  |
| H | 3.58272000  | 0.19317700  | 1.28416700  |
| H | 2.10495100  | 0.11930100  | 2.28182600  |
| H | 3.46324800  | -1.00801000 | 2.60397700  |
| C | -0.19440900 | -2.70452600 | -1.36389400 |
| H | -0.33125900 | -1.78798900 | -1.95132000 |
| H | 0.14888700  | -3.51731500 | -2.01892400 |
| H | -1.16328200 | -2.97110200 | -0.91937600 |
| C | 2.59377300  | 2.82418900  | -0.93850800 |
| C | 1.67594100  | 3.43751600  | -0.14775200 |
| H | 3.42453400  | 3.23321400  | -1.50142800 |
| H | 1.56269700  | 4.48238700  | 0.11563000  |

|   |             |             |             |
|---|-------------|-------------|-------------|
| C | 1.17048000  | 1.20979000  | -0.14986200 |
| N | 2.29889600  | 1.46393100  | -0.93902200 |
| C | 2.90251900  | 0.48297600  | -1.81920600 |
| H | 3.58279900  | -0.19641600 | -1.28220400 |
| H | 2.10658400  | -0.12016900 | -2.28196200 |
| H | 3.46693300  | 1.00535000  | -2.60177400 |
| C | -0.19319600 | 2.70558000  | 1.36235500  |
| H | -0.33019000 | 1.78979800  | 1.95092600  |
| H | 0.14952900  | 3.51930200  | 2.01651900  |
| H | -1.16187000 | 2.97140000  | 0.91694100  |
| N | 0.81878300  | 2.46160700  | 0.34557800  |

C(NHC<sub>Me</sub>)<sub>2</sub>-NH<sub>2</sub>Cl

|    |             |             |             |
|----|-------------|-------------|-------------|
| N  | -2.28376700 | 3.94943600  | 0.00608000  |
| H  | -2.22823300 | 4.20606600  | 1.00230600  |
| H  | -1.63463400 | 4.60489000  | -0.45258700 |
| Cl | -1.21660200 | 2.33825500  | -0.00103700 |
| C  | 0.00185100  | 0.17802800  | -0.06794600 |
| C  | -1.98861300 | -2.68454500 | 0.94889600  |
| C  | -2.81576000 | -2.09482100 | 0.04591400  |
| H  | -2.13595100 | -3.55962200 | 1.57122900  |
| H  | -3.81576800 | -2.36847400 | -0.26958000 |
| C  | -0.88916600 | -0.86012800 | 0.08823100  |
| N  | -0.80577300 | -1.94958800 | 0.97205500  |
| N  | -2.15329500 | -0.99813200 | -0.48843100 |
| C  | 0.26082300  | -2.10022400 | 1.93847900  |
| H  | 1.17194800  | -2.53002800 | 1.49203400  |
| H  | 0.51625000  | -1.10908200 | 2.34610700  |
| H  | -0.07907800 | -2.75585100 | 2.75054800  |
| C  | -2.65592300 | -0.17146400 | -1.57230200 |
| H  | -1.80834800 | 0.37695200  | -2.00075800 |
| H  | -3.11800300 | -0.81219100 | -2.33864400 |
| H  | -3.38662300 | 0.56619900  | -1.21206400 |
| C  | 3.48848900  | -0.57110700 | -0.76328500 |
| C  | 3.60197900  | 0.60598100  | -0.09627400 |
| H  | 4.24589700  | -1.19387700 | -1.22534500 |
| H  | 4.48126700  | 1.19051600  | 0.14835000  |
| C  | 1.36991500  | 0.08458000  | -0.14712700 |
| N  | 2.13615700  | -0.90827900 | -0.79049700 |
| C  | 1.55205600  | -1.95756400 | -1.59732200 |
| H  | 1.15151800  | -2.78263700 | -0.98660000 |
| H  | 0.72186400  | -1.54076200 | -2.19007500 |
| H  | 2.31831500  | -2.35862200 | -2.27331900 |
| C  | 2.04604300  | 2.12530600  | 1.16606600  |
| H  | 2.19407500  | 1.83934000  | 2.22204600  |
| H  | 2.71578100  | 2.96312900  | 0.92615700  |

|   |            |            |            |
|---|------------|------------|------------|
| H | 1.00384700 | 2.43638900 | 1.02019700 |
| N | 2.32638300 | 1.01414500 | 0.27617100 |

C(NHC<sub>Me</sub>)<sub>2</sub>-NH<sub>2</sub>Br

|    |             |             |             |
|----|-------------|-------------|-------------|
| N  | 4.36272700  | -0.90552700 | -0.03164600 |
| H  | 4.52487500  | -1.14952500 | 0.95674200  |
| H  | 4.39427900  | -1.81796000 | -0.51038700 |
| Br | 2.29503500  | -0.57121600 | -0.00119900 |
| C  | -0.14258300 | -0.02051600 | -0.03341800 |
| C  | -1.18077300 | 3.31876400  | 0.95386200  |
| C  | -0.16553300 | 3.60435400  | 0.09720100  |
| H  | -1.80135600 | 3.97453000  | 1.55343200  |
| H  | 0.25651900  | 4.55871800  | -0.19491100 |
| C  | -0.39737000 | 1.32903300  | 0.11757900  |
| N  | -1.33969300 | 1.93553900  | 0.96394100  |
| N  | 0.30434000  | 2.40612000  | -0.42402400 |
| C  | -2.16577000 | 1.19268900  | 1.89201600  |
| H  | -3.05002600 | 0.75224800  | 1.40420700  |
| H  | -1.56961000 | 0.37314000  | 2.32375400  |
| H  | -2.50028000 | 1.86508300  | 2.69240000  |
| C  | 1.29284200  | 2.30164700  | -1.48502100 |
| H  | 1.15680000  | 1.33752000  | -1.99011300 |
| H  | 1.14351800  | 3.12493900  | -2.19917400 |
| H  | 2.31736200  | 2.33024700  | -1.08897000 |
| C  | -2.95054900 | -2.17671200 | -0.85562400 |
| C  | -2.17994300 | -3.02375900 | -0.12659000 |
| H  | -3.88726600 | -2.34622600 | -1.37396600 |
| H  | -2.33093900 | -4.06655800 | 0.12704800  |
| C  | -1.10336200 | -1.00287900 | -0.15110200 |
| N  | -2.31140600 | -0.93875300 | -0.86985200 |
| C  | -2.67578200 | 0.17905600  | -1.71409000 |
| H  | -3.09102900 | 1.02140100  | -1.13795800 |
| H  | -1.77948300 | 0.53802200  | -2.24434000 |
| H  | -3.42455400 | -0.15309300 | -2.44471300 |
| C  | -0.12359500 | -2.82025300 | 1.29719300  |
| H  | -0.50292100 | -2.64458600 | 2.31879300  |
| H  | 0.02038600  | -3.89927000 | 1.14967400  |
| H  | 0.83755600  | -2.30492500 | 1.17573900  |
| N  | -1.05675900 | -2.32447600 | 0.30053500  |

C(NHC<sub>Me</sub>)<sub>2</sub>-NH<sub>2</sub>I

|   |             |             |             |
|---|-------------|-------------|-------------|
| N | 4.44958300  | -0.18236300 | -0.04371100 |
| H | 4.68362000  | -0.39860800 | 0.93618400  |
| H | 4.65352700  | -1.06249300 | -0.53919600 |
| I | 2.21097600  | -0.17898000 | -0.00075100 |
| C | -0.40694600 | -0.01428500 | -0.02623500 |

|   |             |             |             |
|---|-------------|-------------|-------------|
| C | -2.07002500 | 3.05566400  | 0.99106400  |
| C | -1.13278400 | 3.54275700  | 0.13701100  |
| H | -2.80369200 | 3.57114100  | 1.59984000  |
| H | -0.90510800 | 4.56384200  | -0.14533600 |
| C | -0.91377200 | 1.26596000  | 0.13623400  |
| N | -1.95373100 | 1.66856600  | 0.98844800  |
| N | -0.43885700 | 2.46398600  | -0.39616200 |
| C | -2.62294400 | 0.77183500  | 1.90749200  |
| H | -3.41104600 | 0.18091900  | 1.41433700  |
| H | -1.88165200 | 0.07354900  | 2.32696400  |
| H | -3.07377300 | 1.35950500  | 2.71739500  |
| C | 0.52442300  | 2.56917900  | -1.48036300 |
| H | 0.57418800  | 1.60164100  | -1.99499800 |
| H | 0.19399100  | 3.35033600  | -2.18093300 |
| H | 1.53122000  | 2.80281700  | -1.10734500 |
| C | -2.84057100 | -2.56853600 | -0.91103900 |
| C | -1.97364500 | -3.29289000 | -0.15886100 |
| H | -3.72664400 | -2.87396300 | -1.45543100 |
| H | -1.97519900 | -4.34666000 | 0.09417000  |
| C | -1.20559400 | -1.13658200 | -0.16348800 |
| N | -2.38884800 | -1.25103600 | -0.91402500 |
| C | -2.89729900 | -0.19907100 | -1.76916500 |
| H | -3.45948000 | 0.56294700  | -1.20622400 |
| H | -2.05108500 | 0.29878400  | -2.26791400 |
| H | -3.55893000 | -0.64116200 | -2.52515400 |
| C | -0.03391400 | -2.78712900 | 1.34349400  |
| H | -0.46329900 | -2.59878400 | 2.34264400  |
| H | 0.21520400  | -3.85296700 | 1.25524700  |
| H | 0.88043200  | -2.19070500 | 1.22789900  |
| N | -0.97751100 | -2.43566700 | 0.29556700  |

C(NHC<sub>Me</sub>)<sub>2</sub>-ClCF<sub>3</sub>

|    |             |             |             |
|----|-------------|-------------|-------------|
| C  | -3.81921900 | 0.67071500  | 0.14817600  |
| F  | -4.15114000 | 0.50278300  | 1.44620100  |
| F  | -4.47605200 | -0.26313100 | -0.57347800 |
| F  | -4.26294000 | 1.88535900  | -0.24077800 |
| Cl | -2.04840000 | 0.53096200  | -0.08462200 |
| C  | 0.87927700  | 0.06592500  | -0.41353400 |
| C  | 0.67929700  | -3.27827600 | 0.99531200  |
| C  | 0.08573000  | -3.45545600 | -0.21461500 |
| H  | 0.82554000  | -3.97379600 | 1.81371000  |
| H  | -0.36549900 | -4.34002900 | -0.64887700 |
| C  | 0.78533300  | -1.27141500 | -0.12364900 |
| N  | 1.12847900  | -1.95915100 | 1.05453600  |
| N  | 0.14455100  | -2.24740400 | -0.89694400 |
| C  | 1.59338000  | -1.27755100 | 2.24434700  |

|   |             |             |             |
|---|-------------|-------------|-------------|
| H | 2.65662500  | -0.99740900 | 2.17493800  |
| H | 1.00958500  | -0.35330700 | 2.38410600  |
| H | 1.45568500  | -1.93454600 | 3.11265600  |
| C | -0.32750200 | -1.99783000 | -2.24218900 |
| H | -0.38792900 | -0.90690000 | -2.36404600 |
| H | 0.36687400  | -2.40182000 | -2.99826300 |
| H | -1.32075500 | -2.44585100 | -2.38730200 |
| C | 4.01947500  | 1.86515600  | -0.07739700 |
| C | 3.11221600  | 2.87167000  | 0.00883800  |
| H | 5.10298400  | 1.89481100  | -0.05996900 |
| H | 3.26078400  | 3.93861300  | 0.12876900  |
| C | 1.92182200  | 0.91566300  | -0.17269200 |
| N | 3.31308900  | 0.66158300  | -0.15207200 |
| C | 3.87789500  | -0.59878400 | -0.58466900 |
| H | 3.67553400  | -1.40866700 | 0.13249400  |
| H | 3.44872200  | -0.89569000 | -1.55750600 |
| H | 4.96457100  | -0.48513200 | -0.68837700 |
| C | 0.58656900  | 3.02324600  | -0.05072300 |
| H | 0.01182500  | 2.84884700  | 0.87261900  |
| H | 0.78856700  | 4.09725900  | -0.15457200 |
| H | -0.02578600 | 2.67418300  | -0.89602800 |
| N | 1.84259900  | 2.30777300  | -0.03644900 |

C(NHC<sub>Me</sub>)<sub>2</sub>-BrCF<sub>3</sub>

|    |             |             |             |
|----|-------------|-------------|-------------|
| C  | -3.78767600 | 0.38822200  | 0.11730500  |
| F  | -4.16966200 | 0.20369700  | 1.40373700  |
| F  | -4.37693900 | -0.57932300 | -0.62729400 |
| F  | -4.28624500 | 1.57978300  | -0.29097800 |
| Br | -1.77649800 | 0.33191200  | -0.06871200 |
| C  | 0.97019000  | 0.07333200  | -0.27085300 |
| C  | 1.48834100  | -3.28778900 | 1.01707700  |
| C  | 0.77438300  | -3.53992000 | -0.11203600 |
| H  | 1.85079900  | -3.96173100 | 1.78464100  |
| H  | 0.41114200  | -4.47789700 | -0.51543100 |
| C  | 1.11946500  | -1.27743800 | -0.02821400 |
| N  | 1.71471700  | -1.91433900 | 1.06998600  |
| N  | 0.55101600  | -2.32817700 | -0.75107300 |
| C  | 2.24609800  | -1.18907200 | 2.20605800  |
| H  | 3.26899900  | -0.82197400 | 2.02505700  |
| H  | 1.60149000  | -0.31864100 | 2.40389500  |
| H  | 2.25468800  | -1.84880700 | 3.08308600  |
| C  | -0.09492100 | -2.15895200 | -2.03873000 |
| H  | -0.10378000 | -1.08309400 | -2.25695200 |
| H  | 0.46131000  | -2.69111500 | -2.82717500 |
| H  | -1.13018400 | -2.52753900 | -2.00923300 |
| C  | 3.95541200  | 2.15170100  | -0.32683400 |

|   |             |             |             |
|---|-------------|-------------|-------------|
| C | 2.99504500  | 3.06569200  | -0.03695700 |
| H | 5.02146700  | 2.27640600  | -0.47773600 |
| H | 3.07046100  | 4.13521100  | 0.12084200  |
| C | 1.95360100  | 1.02490300  | -0.15647700 |
| N | 3.34243800  | 0.89795200  | -0.37802400 |
| C | 3.94600900  | -0.29006300 | -0.94306500 |
| H | 4.03345100  | -1.10534100 | -0.20801500 |
| H | 3.33334900  | -0.65607600 | -1.78383300 |
| H | 4.94956900  | -0.03920800 | -1.30983300 |
| C | 0.50072300  | 3.00924800  | 0.34206900  |
| H | 0.00652700  | 2.52764800  | 1.19779700  |
| H | 0.66072000  | 4.07226500  | 0.56305400  |
| H | -0.16665900 | 2.91105100  | -0.52727300 |
| N | 1.78464100  | 2.39246700  | 0.08150500  |

C(NHC<sub>Me</sub>)<sub>2</sub>-ICF<sub>3</sub>

|   |             |             |             |
|---|-------------|-------------|-------------|
| C | -3.89584500 | -0.00553700 | -0.00109000 |
| F | -4.41196600 | 0.79968700  | 0.97436200  |
| F | -4.40958800 | -1.25354200 | 0.20964100  |
| F | -4.41337800 | 0.43518700  | -1.18509500 |
| I | -1.60720100 | -0.00490900 | 0.00000100  |
| C | 1.05102700  | -0.00222900 | 0.00334900  |
| C | 3.12167900  | -2.84630500 | 0.92961300  |
| C | 2.20231400  | -3.44624900 | 0.13021100  |
| H | 3.94558900  | -3.26747300 | 1.49387200  |
| H | 2.08205200  | -4.48859000 | -0.14027600 |
| C | 1.71548100  | -1.20994000 | 0.14307400  |
| N | 2.84248300  | -1.48236800 | 0.93436600  |
| N | 1.35637900  | -2.45948200 | -0.36167400 |
| C | 3.45064000  | -0.50899300 | 1.81769100  |
| H | 4.12298300  | 0.17904800  | 1.28118900  |
| H | 2.65761100  | 0.08817700  | 2.29414900  |
| H | 4.02540000  | -1.03630200 | 2.58966100  |
| C | 0.33772000  | -2.68416700 | -1.37332200 |
| H | 0.17338800  | -1.74558600 | -1.91745800 |
| H | 0.68567100  | -3.46156200 | -2.06864000 |
| H | -0.61959600 | -2.98904600 | -0.92725600 |
| C | 3.07355900  | 2.86992300  | -0.94223800 |
| C | 2.15952600  | 3.45562500  | -0.12614800 |
| H | 3.88319600  | 3.30329800  | -1.51780300 |
| H | 2.03095000  | 4.49541200  | 0.15030200  |
| C | 1.69949700  | 1.21388000  | -0.14115700 |
| N | 2.81033500  | 1.50294300  | -0.94865000 |
| C | 3.41781300  | 0.53927600  | -1.84307300 |
| H | 4.10953600  | -0.13872100 | -1.31853300 |
| H | 2.62540400  | -0.06951300 | -2.30555700 |

|   |             |            |             |
|---|-------------|------------|-------------|
| H | 3.97097900  | 1.07537600 | -2.62469800 |
| C | 0.32978000  | 2.66416600 | 1.40491900  |
| H | 0.17386100  | 1.71583800 | 1.93434300  |
| H | 0.68786000  | 3.42925500 | 2.10885100  |
| H | -0.63397600 | 2.97659200 | 0.97849400  |
| N | 1.33308600  | 2.45680900 | 0.37427100  |

C(NHC<sub>Me</sub>)<sub>2</sub>-C<sub>6</sub>F<sub>5</sub>Cl

|    |             |             |             |
|----|-------------|-------------|-------------|
| C  | 5.14284500  | -0.22742100 | 0.11955500  |
| C  | 4.41180600  | -1.38199000 | 0.41278000  |
| C  | 3.02012300  | -1.37174500 | 0.29063400  |
| C  | 2.33512900  | -0.22307500 | -0.12210900 |
| C  | 3.08405000  | 0.92322500  | -0.41150200 |
| C  | 4.47609400  | 0.92913700  | -0.29417200 |
| F  | 2.34362500  | -2.49879800 | 0.58043100  |
| F  | 5.05250500  | -2.49555000 | 0.81104200  |
| F  | 6.48094600  | -0.22934700 | 0.23499300  |
| F  | 5.17895800  | 2.04068600  | -0.57709500 |
| F  | 2.47109800  | 2.05274600  | -0.81290900 |
| Cl | 0.59176800  | -0.22126600 | -0.27147900 |
| C  | -2.36511500 | -0.01132000 | -0.42719100 |
| C  | -2.42819300 | 3.03295800  | 1.55618100  |
| C  | -1.91413300 | 3.48301400  | 0.38089900  |
| H  | -2.60416100 | 3.55363400  | 2.49044500  |
| H  | -1.57307500 | 4.47288900  | 0.10080800  |
| C  | -2.39111500 | 1.25696700  | 0.09574700  |
| N  | -2.74344300 | 1.68480200  | 1.38832700  |
| N  | -1.89087400 | 2.41688400  | -0.50792000 |
| C  | -3.07933700 | 0.75790200  | 2.44886600  |
| H  | -4.10712800 | 0.37293600  | 2.35434800  |
| H  | -2.39218300 | -0.10296400 | 2.41059900  |
| H  | -2.97877400 | 1.26647900  | 3.41619400  |
| C  | -1.44799000 | 2.45878900  | -1.88537000 |
| H  | -1.33229700 | 1.41642600  | -2.21494800 |
| H  | -2.18705200 | 2.95946900  | -2.53302400 |
| H  | -0.48424000 | 2.98193100  | -1.96246400 |
| C  | -5.29261200 | -2.16274000 | -0.31714100 |
| C  | -4.28778600 | -3.06783000 | -0.43890300 |
| H  | -6.36581400 | -2.30850500 | -0.27127100 |
| H  | -4.32468200 | -4.14905600 | -0.50512000 |
| C  | -3.30559400 | -0.99625700 | -0.30905800 |
| N  | -4.71199000 | -0.89692800 | -0.20110400 |
| C  | -5.41866600 | 0.35321200  | -0.38178000 |
| H  | -5.26877300 | 1.03816700  | 0.46662800  |
| H  | -5.06302800 | 0.86370600  | -1.29355100 |
| H  | -6.49176200 | 0.14473500  | -0.47925600 |

|   |             |             |             |
|---|-------------|-------------|-------------|
| C | -1.76568600 | -2.94158800 | -0.60334300 |
| H | -1.16197100 | -2.85775900 | 0.31360100  |
| H | -1.86744200 | -4.00008800 | -0.87570100 |
| H | -1.23639100 | -2.39902700 | -1.40137500 |
| N | -3.08346300 | -2.37425900 | -0.42408700 |

C(NHC<sub>Me</sub>)<sub>2</sub>-C<sub>6</sub>F<sub>5</sub>Br

|    |             |             |             |
|----|-------------|-------------|-------------|
| C  | 5.21725500  | -0.00021400 | 0.00014300  |
| C  | 4.51636400  | -1.19661200 | 0.17583700  |
| C  | 3.11914500  | -1.17893600 | 0.17304200  |
| C  | 2.40167500  | -0.00017700 | -0.00015600 |
| C  | 3.11921400  | 1.17854800  | -0.17320900 |
| C  | 4.51643600  | 1.19620000  | -0.17570400 |
| F  | 2.47660300  | -2.36097300 | 0.34718100  |
| F  | 5.19791200  | -2.34903800 | 0.34551700  |
| F  | 6.56348600  | -0.00023600 | 0.00028600  |
| F  | 5.19803800  | 2.34861200  | -0.34524700 |
| F  | 2.47672800  | 2.36060700  | -0.34748900 |
| Br | 0.37222800  | -0.00023700 | -0.00023600 |
| C  | -2.18194800 | -0.00015500 | -0.00015500 |
| C  | -4.17896500 | 2.82508100  | 1.11664100  |
| C  | -3.23935100 | 3.45127100  | 0.36141000  |
| H  | -4.99414000 | 3.23088500  | 1.70438300  |
| H  | -3.08885200 | 4.50579500  | 0.16266400  |
| C  | -2.81787900 | 1.20602300  | 0.22174100  |
| N  | -3.94036400 | 1.45600000  | 1.02787900  |
| N  | -2.42094000 | 2.47663700  | -0.19562900 |
| C  | -4.57623600 | 0.44043400  | 1.84076700  |
| H  | -5.26435700 | -0.19176900 | 1.25736500  |
| H  | -3.80052200 | -0.20939400 | 2.27547500  |
| H  | -5.13997100 | 0.92731000  | 2.64673400  |
| C  | -1.36738300 | 2.73530800  | -1.16165400 |
| H  | -1.23798800 | 1.84001000  | -1.78286900 |
| H  | -1.65822100 | 3.58752900  | -1.79205900 |
| H  | -0.40697300 | 2.94905300  | -0.67130700 |
| C  | -4.18194000 | -2.82378000 | -1.11570600 |
| C  | -3.24208300 | -3.45076400 | -0.36143900 |
| H  | -4.99801800 | -3.22889100 | -1.70267100 |
| H  | -3.09219600 | -4.50542700 | -0.16296600 |
| C  | -2.81893500 | -1.20581800 | -0.22170600 |
| N  | -3.94234900 | -1.45486900 | -1.02684200 |
| C  | -4.57811600 | -0.43874600 | -1.83911300 |
| H  | -5.26475100 | 0.19435600  | -1.25494200 |
| H  | -3.80226900 | 0.21012800  | -2.27502300 |
| H  | -5.14347500 | -0.92516300 | -2.64421800 |
| C  | -1.36792400 | -2.73644700 | 1.15969100  |

|   |             |             |            |
|---|-------------|-------------|------------|
| H | -1.23747500 | -1.84163700 | 1.78138600 |
| H | -1.65828500 | -3.58900500 | 1.78986200 |
| H | -0.40815000 | -2.95020000 | 0.66809500 |
| N | -2.42252200 | -2.47681400 | 0.19509600 |

C(NHC<sub>Me</sub>)<sub>2</sub>-C<sub>6</sub>F<sub>5</sub>I

|   |             |             |             |
|---|-------------|-------------|-------------|
| C | 5.38558000  | -0.00010600 | -0.00012700 |
| C | 4.68461400  | -1.18936800 | 0.21797100  |
| C | 3.28730200  | -1.16675200 | 0.21399500  |
| C | 2.56403900  | -0.00017800 | 0.00015600  |
| C | 3.28720200  | 1.16642100  | -0.21381600 |
| C | 4.68451300  | 1.18912000  | -0.21808200 |
| F | 2.64842800  | -2.34860400 | 0.43130500  |
| F | 5.36877000  | -2.33562900 | 0.42834400  |
| F | 6.73306400  | -0.00007200 | -0.00025400 |
| F | 5.36855600  | 2.33542300  | -0.42857500 |
| F | 2.64821600  | 2.34825500  | -0.43099500 |
| I | 0.28908000  | -0.00036100 | 0.00005900  |
| C | -2.27513300 | -0.00012300 | -0.00016800 |
| C | -4.34128800 | 2.73962500  | 1.20939600  |
| C | -3.42326300 | 3.41594400  | 0.47159600  |
| H | -5.16480000 | 3.10204900  | 1.81347800  |
| H | -3.30302800 | 4.47982300  | 0.30515000  |
| C | -2.93721900 | 1.19260600  | 0.26306100  |
| N | -4.05950300 | 1.38262800  | 1.08091400  |
| N | -2.57828100 | 2.48328600  | -0.11687300 |
| C | -4.66692900 | 0.32700300  | 1.86587200  |
| H | -5.35160400 | -0.29573700 | 1.26886100  |
| H | -3.87351000 | -0.32179500 | 2.26769300  |
| H | -5.22756600 | 0.77602800  | 2.69540300  |
| C | -1.56532300 | 2.81013800  | -1.10838100 |
| H | -1.44278600 | 1.95258600  | -1.78199100 |
| H | -1.89796700 | 3.68761300  | -1.68036800 |
| H | -0.59121900 | 3.01659500  | -0.64376700 |
| C | -4.34401300 | -2.73821400 | -1.20884200 |
| C | -3.42610800 | -3.41528800 | -0.47158500 |
| H | -5.16832100 | -3.10001600 | -1.81221500 |
| H | -3.30656200 | -4.47927200 | -0.30531900 |
| C | -2.93820900 | -1.19233500 | -0.26315800 |
| N | -4.06114300 | -1.38144800 | -1.08042700 |
| C | -4.66815000 | -0.32534700 | -1.86505600 |
| H | -5.35274500 | 0.29738700  | -1.26793400 |
| H | -3.87444400 | 0.32333600  | -2.26648000 |
| H | -5.22877200 | -0.77386600 | -2.69487900 |
| C | -1.56648400 | -2.81109200 | 1.10700900  |
| H | -1.44255800 | -1.95371000 | 1.78057500  |

|   |             |             |            |
|---|-------------|-------------|------------|
| H | -1.89936400 | -3.68831300 | 1.67924700 |
| H | -0.59301400 | -3.01837500 | 0.64143700 |
| N | -2.58008400 | -2.48330800 | 0.11646300 |

C(NHC<sub>Me</sub>)<sub>2</sub>-C<sub>5</sub>H<sub>4</sub>NCl

|    |             |             |             |
|----|-------------|-------------|-------------|
| C  | 5.70488600  | -1.37926500 | -0.40469400 |
| C  | 4.32099200  | -1.41300800 | -0.59851800 |
| C  | 3.54921700  | -0.42689100 | 0.02062200  |
| C  | 4.18479900  | 0.54293500  | 0.79979100  |
| C  | 5.57559600  | 0.47628400  | 0.92203000  |
| N  | 6.34163000  | -0.45986500 | 0.33869500  |
| H  | 6.33632700  | -2.13867000 | -0.87728400 |
| H  | 3.85664100  | -2.18386800 | -1.21420600 |
| H  | 3.61157400  | 1.32669000  | 1.29569100  |
| H  | 6.10227000  | 1.22223100  | 1.52615000  |
| Cl | 1.81547900  | -0.40590100 | -0.17516900 |
| C  | -1.51872200 | -0.10026300 | -0.49334500 |
| C  | -1.18341000 | 3.26345700  | 0.83599200  |
| C  | -0.71314300 | 3.41926500  | -0.42968600 |
| H  | -1.25464400 | 3.97592800  | 1.64995100  |
| H  | -0.31505800 | 4.29837900  | -0.92326300 |
| C  | -1.40102600 | 1.23531400  | -0.23400800 |
| N  | -1.63432100 | 1.94818000  | 0.96087000  |
| N  | -0.84180400 | 2.20114400  | -1.08458500 |
| C  | -1.94909000 | 1.28137900  | 2.20611700  |
| H  | -2.98229000 | 0.90025000  | 2.22042500  |
| H  | -1.27300900 | 0.42149100  | 2.34941000  |
| H  | -1.82214100 | 1.98989300  | 3.03471400  |
| C  | -0.47158200 | 1.91208300  | -2.45161900 |
| H  | -0.31661400 | 0.82492400  | -2.52098500 |
| H  | -1.26563000 | 2.19784400  | -3.16273200 |
| H  | 0.45480100  | 2.44319700  | -2.71277200 |
| C  | -4.50985900 | -2.02429600 | 0.24693800  |
| C  | -3.55193200 | -2.98734800 | 0.24923100  |
| H  | -5.58195300 | -2.10250900 | 0.38767700  |
| H  | -3.63663900 | -4.05619700 | 0.40846900  |
| C  | -2.48418800 | -0.98368100 | -0.11170600 |
| N  | -3.87465700 | -0.79266200 | 0.06752200  |
| C  | -4.53962500 | 0.43240000  | -0.32108000 |
| H  | -4.26231800 | 1.27300400  | 0.33280000  |
| H  | -4.26482700 | 0.70704900  | -1.35469700 |
| H  | -5.62543800 | 0.28348600  | -0.26174200 |
| C  | -1.04117500 | -3.02033300 | -0.08384600 |
| H  | -0.46865000 | -2.98762500 | 0.85837700  |
| H  | -1.18861700 | -4.06777700 | -0.38082100 |
| H  | -0.45922500 | -2.48585600 | -0.84998100 |

|   |             |             |            |
|---|-------------|-------------|------------|
| N | -2.32486500 | -2.36962000 | 0.04026600 |
|---|-------------|-------------|------------|

C(NHC<sub>Me</sub>)<sub>2</sub>-C<sub>5</sub>H<sub>4</sub>NBr

|    |             |             |             |
|----|-------------|-------------|-------------|
| C  | 5.58084300  | -1.27690000 | -0.35195400 |
| C  | 4.19478500  | -1.33246200 | -0.53088800 |
| C  | 3.41644200  | -0.32810300 | 0.04782400  |
| C  | 4.04998800  | 0.68147400  | 0.77522600  |
| C  | 5.44323200  | 0.63593700  | 0.88887500  |
| N  | 6.21462700  | -0.31795600 | 0.34246100  |
| H  | 6.21646900  | -2.05102400 | -0.79491900 |
| H  | 3.73872600  | -2.13832900 | -1.10748800 |
| H  | 3.47773000  | 1.48381900  | 1.24268900  |
| H  | 5.96720900  | 1.41442000  | 1.45365000  |
| Br | 1.49560000  | -0.33449600 | -0.15234200 |
| C  | -1.57416300 | -0.10176600 | -0.41556600 |
| C  | -1.54609200 | 3.30786000  | 0.84350900  |
| C  | -1.04596500 | 3.47521300  | -0.40949900 |
| H  | -1.69679700 | 4.02657200  | 1.64081000  |
| H  | -0.69511600 | 4.37131800  | -0.90809500 |
| C  | -1.56491100 | 1.25125000  | -0.18572400 |
| N  | -1.88434100 | 1.96227400  | 0.98477100  |
| N  | -1.05289700 | 2.23704900  | -1.03776900 |
| C  | -2.22035100 | 1.30048600  | 2.22806300  |
| H  | -3.26421000 | 0.94833200  | 2.24346100  |
| H  | -1.56618100 | 0.42330400  | 2.35849600  |
| H  | -2.06955400 | 1.99968700  | 3.06055200  |
| C  | -0.64185700 | 1.96226000  | -2.39804700 |
| H  | -0.48791200 | 0.87637600  | -2.47425900 |
| H  | -1.41459900 | 2.26407500  | -3.12521200 |
| H  | 0.29550800  | 2.48912500  | -2.62593500 |
| C  | -4.56442100 | -2.08254900 | 0.17641400  |
| C  | -3.59005300 | -3.02598200 | 0.23854700  |
| H  | -5.64059900 | -2.17947900 | 0.26366500  |
| H  | -3.66117100 | -4.09491800 | 0.40328100  |
| C  | -2.54234200 | -1.00715300 | -0.08273900 |
| N  | -3.94380700 | -0.84062200 | 0.01670700  |
| C  | -4.61618000 | 0.36398300  | -0.42069400 |
| H  | -4.43201700 | 1.20938800  | 0.25947600  |
| H  | -4.26158900 | 0.65595100  | -1.42452200 |
| H  | -5.69647900 | 0.17430400  | -0.46018800 |
| C  | -1.06944100 | -3.02275200 | 0.01978900  |
| H  | -0.45085000 | -2.78607400 | 0.89989400  |
| H  | -1.20953800 | -4.10975400 | -0.04439300 |
| H  | -0.53292300 | -2.66014400 | -0.87024000 |
| N  | -2.36489600 | -2.38565800 | 0.09417700  |

C(NHC<sub>Me</sub>)<sub>2</sub>-C<sub>5</sub>H<sub>4</sub>NI

|   |             |             |             |
|---|-------------|-------------|-------------|
| C | 5.65399000  | -1.12943800 | -0.40960300 |
| C | 4.26431600  | -1.20012400 | -0.55594900 |
| C | 3.47498200  | -0.22039200 | 0.05401300  |
| C | 4.12090800  | 0.78347900  | 0.78217100  |
| C | 5.51739400  | 0.75982300  | 0.86470700  |
| N | 6.29121600  | -0.17287400 | 0.28551500  |
| H | 6.29077900  | -1.88712800 | -0.87984100 |
| H | 3.81491000  | -2.00755400 | -1.13762400 |
| H | 3.55555900  | 1.57360800  | 1.28048500  |
| H | 6.04322000  | 1.53708100  | 1.43053600  |
| I | 1.31404600  | -0.25719900 | -0.12054600 |
| C | -1.62188000 | -0.10992900 | -0.30035900 |
| C | -2.08172100 | 3.30014800  | 0.87984600  |
| C | -1.49468700 | 3.51182200  | -0.32809100 |
| H | -2.37866200 | 4.00276400  | 1.64984000  |
| H | -1.19701900 | 4.43608300  | -0.80935000 |
| C | -1.77712100 | 1.25021700  | -0.10620400 |
| N | -2.26883300 | 1.92681300  | 1.01783400  |
| N | -1.30959600 | 2.27507800  | -0.93047300 |
| C | -2.66659600 | 1.24414900  | 2.23261800  |
| H | -3.69033400 | 0.84235600  | 2.16753200  |
| H | -1.97960800 | 0.40143000  | 2.40631700  |
| H | -2.61155700 | 1.94566600  | 3.07473500  |
| C | -0.79513700 | 2.05400400  | -2.26828200 |
| H | -0.72243100 | 0.96760700  | -2.41078000 |
| H | -1.47375300 | 2.47907600  | -3.02570100 |
| H | 0.20283000  | 2.50103200  | -2.37975300 |
| C | -4.59573700 | -2.18916200 | -0.01805700 |
| C | -3.60999200 | -3.09601900 | 0.19761400  |
| H | -5.67120800 | -2.31711900 | -0.06046500 |
| H | -3.66729500 | -4.16129000 | 0.38836000  |
| C | -2.58862600 | -1.05793100 | -0.06919900 |
| N | -3.99400200 | -0.93612600 | -0.15620200 |
| C | -4.65508700 | 0.23216600  | -0.69807800 |
| H | -4.66989300 | 1.07271700  | 0.01295200  |
| H | -4.13446500 | 0.56834300  | -1.61037500 |
| H | -5.69017600 | -0.03108700 | -0.95087500 |
| C | -1.09121700 | -3.03476200 | 0.31251400  |
| H | -0.52871500 | -2.58902800 | 1.14584300  |
| H | -1.22598400 | -4.10830600 | 0.49656200  |
| H | -0.49930200 | -2.88985600 | -0.60390600 |
| N | -2.39508000 | -2.42048400 | 0.18139800  |
